# Supplementary material for: Circulating lipid profiles are associated with cross-sectional and longitudinal changes of central biomarkers for Alzheimer’s disease
Source: PubMed Central journal article supplement — medRxiv. 2023 Jun 21:2023.06.12.23291054. Preprint. [Version 2] doi: 10.1101/2023.06.12.23291054 (PMC10312871; doi:10.1101/2023.06.12.23291054), 2023-06-21
Supplement: media-1.pdf [file media-1.pdf]

**Supplementary Table 1. Lipid species and classes**

| <b>Lipid Species</b> | <b>Group</b>  | <b>Class (Full name)</b> | <b>Class (Abbreviation)</b> |
|----------------------|---------------|--------------------------|-----------------------------|
| Sph(d18:1)           | sphingolipids | Sphingosine              | Sph                         |
| Sph(d18:2)           | sphingolipids | Sphingosine              | Sph                         |
| S1P(d16:1)           | sphingolipids | Sphingosine-1-phosphate  | S1P                         |
| S1P(d18:0)           | sphingolipids | Sphingosine-1-phosphate  | S1P                         |
| S1P(d18:1)           | sphingolipids | Sphingosine-1-phosphate  | S1P                         |
| S1P(d18:2)           | sphingolipids | Sphingosine-1-phosphate  | S1P                         |
| dhCer(d18:0/16:0)    | sphingolipids | Dihydroceramide          | dhCer                       |
| dhCer(d18:0/18:0)    | sphingolipids | Dihydroceramide          | dhCer                       |
| dhCer(d18:0/20:0)    | sphingolipids | Dihydroceramide          | dhCer                       |
| dhCer(d18:0/22:0)    | sphingolipids | Dihydroceramide          | dhCer                       |
| dhCer(d18:0/24:0)    | sphingolipids | Dihydroceramide          | dhCer                       |
| dhCer(d18:0/24:1)    | sphingolipids | Dihydroceramide          | dhCer                       |
| Cer(d16:1/16:0)      | sphingolipids | Ceramide                 | Cer(d)                      |
| Cer(d16:1/18:0)      | sphingolipids | Ceramide                 | Cer(d)                      |
| Cer(d16:1/20:0)      | sphingolipids | Ceramide                 | Cer(d)                      |
| Cer(d16:1/22:0)      | sphingolipids | Ceramide                 | Cer(d)                      |
| Cer(d16:1/23:0)      | sphingolipids | Ceramide                 | Cer(d)                      |
| Cer(d16:1/24:0)      | sphingolipids | Ceramide                 | Cer(d)                      |
| Cer(d16:1/24:1)      | sphingolipids | Ceramide                 | Cer(d)                      |
| Cer(d17:1/16:0)      | sphingolipids | Ceramide                 | Cer(d)                      |
| Cer(d17:1/18:0)      | sphingolipids | Ceramide                 | Cer(d)                      |
| Cer(d17:1/20:0)      | sphingolipids | Ceramide                 | Cer(d)                      |
| Cer(d17:1/22:0)      | sphingolipids | Ceramide                 | Cer(d)                      |
| Cer(d17:1/23:0)      | sphingolipids | Ceramide                 | Cer(d)                      |
| Cer(d17:1/24:0)      | sphingolipids | Ceramide                 | Cer(d)                      |
| Cer(d17:1/24:1)      | sphingolipids | Ceramide                 | Cer(d)                      |
| Cer(d18:1/14:0)      | sphingolipids | Ceramide                 | Cer(d)                      |
| Cer(d18:1/16:0)      | sphingolipids | Ceramide                 | Cer(d)                      |
| Cer(d18:1/18:0)      | sphingolipids | Ceramide                 | Cer(d)                      |
| Cer(d18:1/19:0)      | sphingolipids | Ceramide                 | Cer(d)                      |
| Cer(d18:1/20:0)      | sphingolipids | Ceramide                 | Cer(d)                      |
| Cer(d18:1/21:0)      | sphingolipids | Ceramide                 | Cer(d)                      |
| Cer(d18:1/22:0)      | sphingolipids | Ceramide                 | Cer(d)                      |
| Cer(d18:1/23:0)      | sphingolipids | Ceramide                 | Cer(d)                      |
| Cer(d18:1/24:0)      | sphingolipids | Ceramide                 | Cer(d)                      |
| Cer(d18:1/24:1)      | sphingolipids | Ceramide                 | Cer(d)                      |
| Cer(d18:1/26:0)      | sphingolipids | Ceramide                 | Cer(d)                      |
| Cer(d18:2/14:0)      | sphingolipids | Ceramide                 | Cer(d)                      |
| Cer(d18:2/16:0)      | sphingolipids | Ceramide                 | Cer(d)                      |
| Cer(d18:2/18:0)      | sphingolipids | Ceramide                 | Cer(d)                      |
| Cer(d18:2/20:0)      | sphingolipids | Ceramide                 | Cer(d)                      |
| Cer(d18:2/21:0)      | sphingolipids | Ceramide                 | Cer(d)                      |
| Cer(d18:2/22:0)      | sphingolipids | Ceramide                 | Cer(d)                      |
| Cer(d18:2/23:0)      | sphingolipids | Ceramide                 | Cer(d)                      |
| Cer(d18:2/24:0)      | sphingolipids | Ceramide                 | Cer(d)                      |
| Cer(d18:2/24:1)      | sphingolipids | Ceramide                 | Cer(d)                      |
| Cer(d18:2/26:0)      | sphingolipids | Ceramide                 | Cer(d)                      |
| Cer(d19:1/16:0)      | sphingolipids | Ceramide                 | Cer(d)                      |
| Cer(d19:1/18:0)      | sphingolipids | Ceramide                 | Cer(d)                      |
| Cer(d19:1/20:0)      | sphingolipids | Ceramide                 | Cer(d)                      |
| Cer(d19:1/22:0)      | sphingolipids | Ceramide                 | Cer(d)                      |
| Cer(d19:1/23:0)      | sphingolipids | Ceramide                 | Cer(d)                      |
| Cer(d19:1/24:0)      | sphingolipids | Ceramide                 | Cer(d)                      |
| Cer(d19:1/24:1)      | sphingolipids | Ceramide                 | Cer(d)                      |

|                         |               |                      |         |
|-------------------------|---------------|----------------------|---------|
| Cer(d19:1/26:0)         | sphingolipids | Ceramide             | Cer(d)  |
| Cer(d20:1/22:0)         | sphingolipids | Ceramide             | Cer(d)  |
| Cer(d20:1/23:0)         | sphingolipids | Ceramide             | Cer(d)  |
| Cer(d20:1/24:0)         | sphingolipids | Ceramide             | Cer(d)  |
| Cer(d20:1/24:1)         | sphingolipids | Ceramide             | Cer(d)  |
| Cer(m18:0/20:0)         | sphingolipids | Deoxyceramide        | Cer(m)  |
| Cer(m18:0/22:0)         | sphingolipids | Deoxyceramide        | Cer(m)  |
| Cer(m18:0/23:0)         | sphingolipids | Deoxyceramide        | Cer(m)  |
| Cer(m18:0/24:0)         | sphingolipids | Deoxyceramide        | Cer(m)  |
| Cer(m18:0/24:1)         | sphingolipids | Deoxyceramide        | Cer(m)  |
| Cer(m18:1/18:0)         | sphingolipids | Deoxyceramide        | Cer(m)  |
| Cer(m18:1/20:0)         | sphingolipids | Deoxyceramide        | Cer(m)  |
| Cer(m18:1/22:0)         | sphingolipids | Deoxyceramide        | Cer(m)  |
| Cer(m18:1/23:0)         | sphingolipids | Deoxyceramide        | Cer(m)  |
| Cer(m18:1/24:0)         | sphingolipids | Deoxyceramide        | Cer(m)  |
| Cer(m18:1/24:1)         | sphingolipids | Deoxyceramide        | Cer(m)  |
| Cer1P(d18:1/16:0)       | sphingolipids | Ceramide-1-phosphate | C1P     |
| HexCer(d16:1/18:0)      | sphingolipids | Monohexosylceramide  | HexCer  |
| HexCer(d16:1/20:0)      | sphingolipids | Monohexosylceramide  | HexCer  |
| HexCer(d16:1/22:0)      | sphingolipids | Monohexosylceramide  | HexCer  |
| HexCer(d16:1/24:0)      | sphingolipids | Monohexosylceramide  | HexCer  |
| HexCer(d18:1/16:0)      | sphingolipids | Monohexosylceramide  | HexCer  |
| HexCer(d18:1/18:0)      | sphingolipids | Monohexosylceramide  | HexCer  |
| HexCer(d18:1/20:0)      | sphingolipids | Monohexosylceramide  | HexCer  |
| HexCer(d18:1/22:0)      | sphingolipids | Monohexosylceramide  | HexCer  |
| HexCer(d18:1/24:0)      | sphingolipids | Monohexosylceramide  | HexCer  |
| HexCer(d18:1/24:1)      | sphingolipids | Monohexosylceramide  | HexCer  |
| HexCer(d18:2/18:0)      | sphingolipids | Monohexosylceramide  | HexCer  |
| HexCer(d18:2/20:0)      | sphingolipids | Monohexosylceramide  | HexCer  |
| HexCer(d18:2/22:0)      | sphingolipids | Monohexosylceramide  | HexCer  |
| HexCer(d18:2/24:0)      | sphingolipids | Monohexosylceramide  | HexCer  |
| Hex2Cer(d16:1/16:0)     | sphingolipids | Dihexosylceramide    | Hex2Cer |
| Hex2Cer(d16:1/24:1)     | sphingolipids | Dihexosylceramide    | Hex2Cer |
| Hex2Cer(d18:1/16:0)     | sphingolipids | Dihexosylceramide    | Hex2Cer |
| Hex2Cer(d18:1/20:0)     | sphingolipids | Dihexosylceramide    | Hex2Cer |
| Hex2Cer(d18:1/22:0)     | sphingolipids | Dihexosylceramide    | Hex2Cer |
| Hex2Cer(d18:1/24:0)     | sphingolipids | Dihexosylceramide    | Hex2Cer |
| Hex2Cer(d18:1/24:1)     | sphingolipids | Dihexosylceramide    | Hex2Cer |
| Hex2Cer(d18:2/16:0)     | sphingolipids | Dihexosylceramide    | Hex2Cer |
| Hex2Cer(d18:2/24:1)     | sphingolipids | Dihexosylceramide    | Hex2Cer |
| Hex3Cer(d18:1/16:0)     | sphingolipids | Trihexosylceramide   | Hex3Cer |
| Hex3Cer(d18:1/18:0)     | sphingolipids | Trihexosylceramide   | Hex3Cer |
| Hex3Cer(d18:1/20:0)     | sphingolipids | Trihexosylceramide   | Hex3Cer |
| Hex3Cer(d18:1/22:0)     | sphingolipids | Trihexosylceramide   | Hex3Cer |
| Hex3Cer(d18:1/24:0)     | sphingolipids | Trihexosylceramide   | Hex3Cer |
| Hex3Cer(d18:1/24:1)     | sphingolipids | Trihexosylceramide   | Hex3Cer |
| GM3(d18:1/16:0)         | sphingolipids | GM3 ganglioside      | GM3     |
| GM3(d18:1/18:0)         | sphingolipids | GM3 ganglioside      | GM3     |
| GM3(d18:1/20:0)         | sphingolipids | GM3 ganglioside      | GM3     |
| GM3(d18:1/22:0)         | sphingolipids | GM3 ganglioside      | GM3     |
| GM3(d18:1/24:0)         | sphingolipids | GM3 ganglioside      | GM3     |
| GM3(d18:1/24:1)         | sphingolipids | GM3 ganglioside      | GM3     |
| GM1(d18:1/16:0)         | sphingolipids | GM1 ganglioside      | GM1     |
| SHexCer(d18:1/16:0(OH)) | sphingolipids | Sulfatide            | SHexCer |
| SHexCer(d18:1/16:0)     | sphingolipids | Sulfatide            | SHexCer |
| SHexCer(d18:1/24:0(OH)) | sphingolipids | Sulfatide            | SHexCer |
| SHexCer(d18:1/24:0)     | sphingolipids | Sulfatide            | SHexCer |

|                                 |                      |                     |         |
|---------------------------------|----------------------|---------------------|---------|
| SHexCer(d18:1/24:1(OH))         | sphingolipids        | Sulfatide           | SHexCer |
| SHexCer(d18:1/24:1)             | sphingolipids        | Sulfatide           | SHexCer |
| SM(34:3)                        | sphingolipids        | Sphingomyelin       | SM      |
| SM(35:2) (b)                    | sphingolipids        | Sphingomyelin       | SM      |
| SM(37:1)                        | sphingolipids        | Sphingomyelin       | SM      |
| SM(37:2)                        | sphingolipids        | Sphingomyelin       | SM      |
| SM(38:3) (a)                    | sphingolipids        | Sphingomyelin       | SM      |
| SM(38:3) (b)                    | sphingolipids        | Sphingomyelin       | SM      |
| SM(40:3) (a)                    | sphingolipids        | Sphingomyelin       | SM      |
| SM(40:3) (b)                    | sphingolipids        | Sphingomyelin       | SM      |
| SM(41:0)                        | sphingolipids        | Sphingomyelin       | SM      |
| SM(41:1) (a)                    | sphingolipids        | Sphingomyelin       | SM      |
| SM(43:1)                        | sphingolipids        | Sphingomyelin       | SM      |
| SM(43:2) (b)                    | sphingolipids        | Sphingomyelin       | SM      |
| SM(43:2) (c)                    | sphingolipids        | Sphingomyelin       | SM      |
| SM(44:1)                        | sphingolipids        | Sphingomyelin       | SM      |
| SM(44:2)                        | sphingolipids        | Sphingomyelin       | SM      |
| SM(44:3)                        | sphingolipids        | Sphingomyelin       | SM      |
| SM(d16:1/19:0)                  | sphingolipids        | Sphingomyelin       | SM      |
| SM(d16:1/23:0) & SM(d17:1/22:0) | sphingolipids        | Sphingomyelin       | SM      |
| SM(d16:1/24:1)                  | sphingolipids        | Sphingomyelin       | SM      |
| SM(d17:1/14:0)                  | sphingolipids        | Sphingomyelin       | SM      |
| SM(d17:1/16:0)                  | sphingolipids        | Sphingomyelin       | SM      |
| SM(d17:1/24:1)                  | sphingolipids        | Sphingomyelin       | SM      |
| SM(d18:0/14:0)                  | sphingolipids        | Sphingomyelin       | SM      |
| SM(d18:0/16:0)                  | sphingolipids        | Sphingomyelin       | SM      |
| SM(d18:0/22:0)                  | sphingolipids        | Sphingomyelin       | SM      |
| SM(d18:1/14:0) & SM(d16:1/16:0) | sphingolipids        | Sphingomyelin       | SM      |
| SM(d18:1/16:0)                  | sphingolipids        | Sphingomyelin       | SM      |
| SM(d18:1/17:0) & SM(d17:1/18:0) | sphingolipids        | Sphingomyelin       | SM      |
| SM(d18:1/18:0) & SM(d16:1/20:0) | sphingolipids        | Sphingomyelin       | SM      |
| SM(d18:1/20:0) & SM(d16:1/22:0) | sphingolipids        | Sphingomyelin       | SM      |
| SM(d18:1/22:0) & SM(d16:1/24:0) | sphingolipids        | Sphingomyelin       | SM      |
| SM(d18:1/23:0) & SM(d17:1/24:0) | sphingolipids        | Sphingomyelin       | SM      |
| SM(d18:1/24:0)                  | sphingolipids        | Sphingomyelin       | SM      |
| SM(d18:1/24:1)                  | sphingolipids        | Sphingomyelin       | SM      |
| SM(d18:2/14:0)                  | sphingolipids        | Sphingomyelin       | SM      |
| SM(d18:2/16:0)                  | sphingolipids        | Sphingomyelin       | SM      |
| SM(d18:2/17:0)                  | sphingolipids        | Sphingomyelin       | SM      |
| SM(d18:2/18:0)                  | sphingolipids        | Sphingomyelin       | SM      |
| SM(d18:2/18:1)                  | sphingolipids        | Sphingomyelin       | SM      |
| SM(d18:2/20:0)                  | sphingolipids        | Sphingomyelin       | SM      |
| SM(d18:2/22:0)                  | sphingolipids        | Sphingomyelin       | SM      |
| SM(d18:2/23:0)                  | sphingolipids        | Sphingomyelin       | SM      |
| SM(d18:2/24:0)                  | sphingolipids        | Sphingomyelin       | SM      |
| SM(d19:1/24:1)                  | sphingolipids        | Sphingomyelin       | SM      |
| PA(34:1)                        | glycerophospholipids | Phosphatidic acid   | PA      |
| PA(36:1)                        | glycerophospholipids | Phosphatidic acid   | PA      |
| PA(36:2)                        | glycerophospholipids | Phosphatidic acid   | PA      |
| PA(36:3)                        | glycerophospholipids | Phosphatidic acid   | PA      |
| PA(36:4)                        | glycerophospholipids | Phosphatidic acid   | PA      |
| PA(40:6)                        | glycerophospholipids | Phosphatidic acid   | PA      |
| PC(14:0_16:0)                   | glycerophospholipids | Phosphatidylcholine | PC      |
| PC(14:0_20:4)                   | glycerophospholipids | Phosphatidylcholine | PC      |
| PC(14:0_22:6)                   | glycerophospholipids | Phosphatidylcholine | PC      |
| PC(15-MHDA_18:1)                | glycerophospholipids | Phosphatidylcholine | PC      |
| PC(15-MHDA_18:2)                | glycerophospholipids | Phosphatidylcholine | PC      |



|                     |                      |                                             |       |
|---------------------|----------------------|---------------------------------------------|-------|
| PC(38:7) (c)        | glycerophospholipids | Phosphatidylcholine                         | PC    |
| PC(39:5) (a)        | glycerophospholipids | Phosphatidylcholine                         | PC    |
| PC(39:5) (b)        | glycerophospholipids | Phosphatidylcholine                         | PC    |
| PC(40:7) (a)        | glycerophospholipids | Phosphatidylcholine                         | PC    |
| PC(40:8)            | glycerophospholipids | Phosphatidylcholine                         | PC    |
| PC(44:12)           | glycerophospholipids | Phosphatidylcholine                         | PC    |
| PC(O-16:0/16:0)     | glycerophospholipids | Alkylphosphatidylcholine                    | PC(O) |
| PC(O-16:0/20:3)     | glycerophospholipids | Alkylphosphatidylcholine                    | PC(O) |
| PC(O-16:0/20:4)     | glycerophospholipids | Alkylphosphatidylcholine                    | PC(O) |
| PC(O-16:0/22:6)     | glycerophospholipids | Alkylphosphatidylcholine                    | PC(O) |
| PC(O-18:0/18:1)     | glycerophospholipids | Alkylphosphatidylcholine                    | PC(O) |
| PC(O-18:0/18:2)     | glycerophospholipids | Alkylphosphatidylcholine                    | PC(O) |
| PC(O-18:0/20:4)     | glycerophospholipids | Alkylphosphatidylcholine                    | PC(O) |
| PC(O-18:0/22:6)     | glycerophospholipids | Alkylphosphatidylcholine                    | PC(O) |
| PC(O-18:1/18:1)     | glycerophospholipids | Alkylphosphatidylcholine                    | PC(O) |
| PC(O-18:1/18:2)     | glycerophospholipids | Alkylphosphatidylcholine                    | PC(O) |
| PC(O-32:1)          | glycerophospholipids | Alkylphosphatidylcholine                    | PC(O) |
| PC(O-32:2)          | glycerophospholipids | Alkylphosphatidylcholine                    | PC(O) |
| PC(O-34:1)          | glycerophospholipids | Alkylphosphatidylcholine                    | PC(O) |
| PC(O-34:2)          | glycerophospholipids | Alkylphosphatidylcholine                    | PC(O) |
| PC(O-34:4)          | glycerophospholipids | Alkylphosphatidylcholine                    | PC(O) |
| PC(O-35:4)          | glycerophospholipids | Alkylphosphatidylcholine                    | PC(O) |
| PC(O-36:0)          | glycerophospholipids | Alkylphosphatidylcholine                    | PC(O) |
| PC(O-36:5)          | glycerophospholipids | Alkylphosphatidylcholine                    | PC(O) |
| PC(O-38:5)          | glycerophospholipids | Alkylphosphatidylcholine                    | PC(O) |
| PC(O-40:5)          | glycerophospholipids | Alkylphosphatidylcholine                    | PC(O) |
| PC(P-15:0/20:4) (a) | glycerophospholipids | Alkenylphosphatidylcholine<br>(plasmalogen) | PC(P) |
| PC(P-15:0/20:4) (b) | glycerophospholipids | Alkenylphosphatidylcholine<br>(plasmalogen) | PC(P) |
| PC(P-16:0/14:0)     | glycerophospholipids | Alkenylphosphatidylcholine<br>(plasmalogen) | PC(P) |
| PC(P-16:0/16:0)     | glycerophospholipids | Alkenylphosphatidylcholine<br>(plasmalogen) | PC(P) |
| PC(P-16:0/16:1)     | glycerophospholipids | Alkenylphosphatidylcholine<br>(plasmalogen) | PC(P) |
| PC(P-16:0/18:0)     | glycerophospholipids | Alkenylphosphatidylcholine<br>(plasmalogen) | PC(P) |
| PC(P-16:0/18:1)     | glycerophospholipids | Alkenylphosphatidylcholine<br>(plasmalogen) | PC(P) |
| PC(P-16:0/18:2)     | glycerophospholipids | Alkenylphosphatidylcholine<br>(plasmalogen) | PC(P) |
| PC(P-16:0/18:3)     | glycerophospholipids | Alkenylphosphatidylcholine<br>(plasmalogen) | PC(P) |
| PC(P-16:0/20:4)     | glycerophospholipids | Alkenylphosphatidylcholine<br>(plasmalogen) | PC(P) |
| PC(P-16:0/20:5)     | glycerophospholipids | Alkenylphosphatidylcholine<br>(plasmalogen) | PC(P) |
| PC(P-16:0/22:6)     | glycerophospholipids | Alkenylphosphatidylcholine<br>(plasmalogen) | PC(P) |
| PC(P-17:0/20:4) (a) | glycerophospholipids | Alkenylphosphatidylcholine<br>(plasmalogen) | PC(P) |
| PC(P-17:0/20:4) (b) | glycerophospholipids | Alkenylphosphatidylcholine<br>(plasmalogen) | PC(P) |
| PC(P-18:0/18:2)     | glycerophospholipids | Alkenylphosphatidylcholine<br>(plasmalogen) | PC(P) |

|                                           |                      |                                          |       |
|-------------------------------------------|----------------------|------------------------------------------|-------|
| PC(P-18:0/20:4)                           | glycerophospholipids | Alkenylphosphatidylcholine (plasmalogen) | PC(P) |
| PC(P-18:0/22:5)                           | glycerophospholipids | Alkenylphosphatidylcholine (plasmalogen) | PC(P) |
| PC(P-18:0/22:6)                           | glycerophospholipids | Alkenylphosphatidylcholine (plasmalogen) | PC(P) |
| PC(P-18:1/18:1)                           | glycerophospholipids | Alkenylphosphatidylcholine (plasmalogen) | PC(P) |
| PC(P-18:1/22:6)                           | glycerophospholipids | Alkenylphosphatidylcholine (plasmalogen) | PC(P) |
| PC(P-20:0/20:4)                           | glycerophospholipids | Alkenylphosphatidylcholine (plasmalogen) | PC(P) |
| PC(P-35:2) (a)                            | glycerophospholipids | Alkenylphosphatidylcholine (plasmalogen) | PC(P) |
| PC(P-35:2) (b)                            | glycerophospholipids | Alkenylphosphatidylcholine (plasmalogen) | PC(P) |
| PC(P-36:3)                                | glycerophospholipids | Alkenylphosphatidylcholine (plasmalogen) | PC(P) |
| PC(P-38:5) (a)                            | glycerophospholipids | Alkenylphosphatidylcholine (plasmalogen) | PC(P) |
| PC(P-38:5) (b)                            | glycerophospholipids | Alkenylphosphatidylcholine (plasmalogen) | PC(P) |
| LPC(14:0) [sn1]                           | glycerophospholipids | Lysophosphatidylcholine                  | LPC   |
| LPC(14:0) [sn2]                           | glycerophospholipids | Lysophosphatidylcholine                  | LPC   |
| LPC(15-MHDA) [sn1] [104_sn1]              | glycerophospholipids | Lysophosphatidylcholine                  | LPC   |
| LPC(15-MHDA) [sn1] & LPC(17:0) [sn2]      | glycerophospholipids | Lysophosphatidylcholine                  | LPC   |
| LPC(15-MHDA) [sn2]                        | glycerophospholipids | Lysophosphatidylcholine                  | LPC   |
| LPC(15:0) [sn1]                           | glycerophospholipids | Lysophosphatidylcholine                  | LPC   |
| LPC(15:0) [sn2]                           | glycerophospholipids | Lysophosphatidylcholine                  | LPC   |
| LPC(16:0) [sn1]                           | glycerophospholipids | Lysophosphatidylcholine                  | LPC   |
| LPC(16:0) [sn2]                           | glycerophospholipids | Lysophosphatidylcholine                  | LPC   |
| LPC(16:1) [sn1]                           | glycerophospholipids | Lysophosphatidylcholine                  | LPC   |
| LPC(16:1) [sn2]                           | glycerophospholipids | Lysophosphatidylcholine                  | LPC   |
| LPC(17:0) [sn1]                           | glycerophospholipids | Lysophosphatidylcholine                  | LPC   |
| LPC(17:1) (a) [sn1] [104_sn1]             | glycerophospholipids | Lysophosphatidylcholine                  | LPC   |
| LPC(17:1) [sn1] (a) & LPC(17:1) [sn2] (b) | glycerophospholipids | Lysophosphatidylcholine                  | LPC   |
| LPC(17:1) [sn1] (b)                       | glycerophospholipids | Lysophosphatidylcholine                  | LPC   |
| LPC(17:1) [sn2] (a)                       | glycerophospholipids | Lysophosphatidylcholine                  | LPC   |
| LPC(18:0) [sn1]                           | glycerophospholipids | Lysophosphatidylcholine                  | LPC   |
| LPC(18:0) [sn2]                           | glycerophospholipids | Lysophosphatidylcholine                  | LPC   |
| LPC(18:1) [sn1]                           | glycerophospholipids | Lysophosphatidylcholine                  | LPC   |
| LPC(18:1) [sn2]                           | glycerophospholipids | Lysophosphatidylcholine                  | LPC   |
| LPC(18:2) [sn1]                           | glycerophospholipids | Lysophosphatidylcholine                  | LPC   |
| LPC(18:2) [sn2]                           | glycerophospholipids | Lysophosphatidylcholine                  | LPC   |
| LPC(18:3) (a) [sn1] [104_sn1]             | glycerophospholipids | Lysophosphatidylcholine                  | LPC   |
| LPC(18:3) [sn1] (a) & LPC(18:3) [sn2] (b) | glycerophospholipids | Lysophosphatidylcholine                  | LPC   |
| LPC(18:3) [sn1] (b)                       | glycerophospholipids | Lysophosphatidylcholine                  | LPC   |
| LPC(18:3) [sn2] (a)                       | glycerophospholipids | Lysophosphatidylcholine                  | LPC   |
| LPC(19:0) (a) [sn1] [104_sn1]             | glycerophospholipids | Lysophosphatidylcholine                  | LPC   |
| LPC(19:0) [sn1] (a) & LPC(19:0) [sn2] (b) | glycerophospholipids | Lysophosphatidylcholine                  | LPC   |
| LPC(19:0) [sn1] (b)                       | glycerophospholipids | Lysophosphatidylcholine                  | LPC   |
| LPC(19:0) [sn2] (a)                       | glycerophospholipids | Lysophosphatidylcholine                  | LPC   |
| LPC(19:1) (a)                             | glycerophospholipids | Lysophosphatidylcholine                  | LPC   |
| LPC(19:1) (b)                             | glycerophospholipids | Lysophosphatidylcholine                  | LPC   |
| LPC(19:1) (c)                             | glycerophospholipids | Lysophosphatidylcholine                  | LPC   |
| LPC(20:0) [sn1]                           | glycerophospholipids | Lysophosphatidylcholine                  | LPC   |
| LPC(20:0) [sn2]                           | glycerophospholipids | Lysophosphatidylcholine                  | LPC   |

|                                             |                      |                                                                  |        |
|---------------------------------------------|----------------------|------------------------------------------------------------------|--------|
| LPC(20:1) [sn1]                             | glycerophospholipids | Lysophosphatidylcholine                                          | LPC    |
| LPC(20:1) [sn2]                             | glycerophospholipids | Lysophosphatidylcholine                                          | LPC    |
| LPC(20:2) [sn1]                             | glycerophospholipids | Lysophosphatidylcholine                                          | LPC    |
| LPC(20:2) [sn2]                             | glycerophospholipids | Lysophosphatidylcholine                                          | LPC    |
| LPC(20:3) [sn1]                             | glycerophospholipids | Lysophosphatidylcholine                                          | LPC    |
| LPC(20:3) [sn2]                             | glycerophospholipids | Lysophosphatidylcholine                                          | LPC    |
| LPC(20:4) [sn1]                             | glycerophospholipids | Lysophosphatidylcholine                                          | LPC    |
| LPC(20:4) [sn2]                             | glycerophospholipids | Lysophosphatidylcholine                                          | LPC    |
| LPC(20:5) [sn1]                             | glycerophospholipids | Lysophosphatidylcholine                                          | LPC    |
| LPC(20:5) [sn2]                             | glycerophospholipids | Lysophosphatidylcholine                                          | LPC    |
| LPC(22:0) [sn1]                             | glycerophospholipids | Lysophosphatidylcholine                                          | LPC    |
| LPC(22:0) [sn2]                             | glycerophospholipids | Lysophosphatidylcholine                                          | LPC    |
| LPC(22:1) [sn1]                             | glycerophospholipids | Lysophosphatidylcholine                                          | LPC    |
| LPC(22:1) [sn2]                             | glycerophospholipids | Lysophosphatidylcholine                                          | LPC    |
| LPC(22:4) [sn1]                             | glycerophospholipids | Lysophosphatidylcholine                                          | LPC    |
| LPC(22:4) [sn2]                             | glycerophospholipids | Lysophosphatidylcholine                                          | LPC    |
| LPC(22:5) (n3) [sn1] [104_sn1]              | glycerophospholipids | Lysophosphatidylcholine                                          | LPC    |
| LPC(22:5) [sn1] (n3) & LPC(22:5) [sn2] (n6) | glycerophospholipids | Lysophosphatidylcholine                                          | LPC    |
| LPC(22:5) [sn1] (n6)                        | glycerophospholipids | Lysophosphatidylcholine                                          | LPC    |
| LPC(22:5) [sn2] (n3)                        | glycerophospholipids | Lysophosphatidylcholine                                          | LPC    |
| LPC(22:6) [sn1]                             | glycerophospholipids | Lysophosphatidylcholine                                          | LPC    |
| LPC(22:6) [sn2]                             | glycerophospholipids | Lysophosphatidylcholine                                          | LPC    |
| LPC(24:0) [sn1]                             | glycerophospholipids | Lysophosphatidylcholine                                          | LPC    |
| LPC(24:0) [sn2]                             | glycerophospholipids | Lysophosphatidylcholine                                          | LPC    |
| LPC(26:0) [sn1]                             | glycerophospholipids | Lysophosphatidylcholine                                          | LPC    |
| LPC(26:0) [sn2]                             | glycerophospholipids | Lysophosphatidylcholine                                          | LPC    |
| LPC(O-16:0)                                 | glycerophospholipids | Lysoalkylphosphatidylcholine<br>(lysoplatelet activating factor) | LPC(O) |
| LPC(O-18:0)                                 | glycerophospholipids | Lysoalkylphosphatidylcholine<br>(lysoplatelet activating factor) | LPC(O) |
| LPC(O-18:1)                                 | glycerophospholipids | Lysoalkylphosphatidylcholine<br>(lysoplatelet activating factor) | LPC(O) |
| LPC(O-20:0)                                 | glycerophospholipids | Lysoalkylphosphatidylcholine<br>(lysoplatelet activating factor) | LPC(O) |
| LPC(O-20:1)                                 | glycerophospholipids | Lysoalkylphosphatidylcholine<br>(lysoplatelet activating factor) | LPC(O) |
| LPC(O-22:0)                                 | glycerophospholipids | Lysoalkylphosphatidylcholine<br>(lysoplatelet activating factor) | LPC(O) |
| LPC(O-22:1)                                 | glycerophospholipids | Lysoalkylphosphatidylcholine<br>(lysoplatelet activating factor) | LPC(O) |
| LPC(O-24:0)                                 | glycerophospholipids | Lysoalkylphosphatidylcholine<br>(lysoplatelet activating factor) | LPC(O) |
| LPC(O-24:1)                                 | glycerophospholipids | Lysoalkylphosphatidylcholine<br>(lysoplatelet activating factor) | LPC(O) |
| LPC(O-24:2)                                 | glycerophospholipids | Lysoalkylphosphatidylcholine<br>(lysoplatelet activating factor) | LPC(O) |
| LPC(P-16:0)                                 | glycerophospholipids | Lysoalkenylphosphatidylcholine<br>(plasmalogen)                  | LPC(P) |
| LPC(P-17:0) (a)                             | glycerophospholipids | Lysoalkenylphosphatidylcholine<br>(plasmalogen)                  | LPC(P) |
| LPC(P-17:0) (b)                             | glycerophospholipids | Lysoalkenylphosphatidylcholine<br>(plasmalogen)                  | LPC(P) |
| LPC(P-18:0)                                 | glycerophospholipids | Lysoalkenylphosphatidylcholine<br>(plasmalogen)                  | LPC(P) |
| LPC(P-18:1)                                 | glycerophospholipids | Lysoalkenylphosphatidylcholine<br>(plasmalogen)                  | LPC(P) |

|                     |                      |                                               |        |
|---------------------|----------------------|-----------------------------------------------|--------|
| LPC(P-20:0)         | glycerophospholipids | Lysoalkenylphosphatidylcholine (plasmalogen)  | LPC(P) |
| PE(15-MHDA_18:1)    | glycerophospholipids | Phosphatidylethanolamine                      | PE     |
| PE(15-MHDA_18:2)    | glycerophospholipids | Phosphatidylethanolamine                      | PE     |
| PE(15-MHDA_20:4)    | glycerophospholipids | Phosphatidylethanolamine                      | PE     |
| PE(15-MHDA_22:6)    | glycerophospholipids | Phosphatidylethanolamine                      | PE     |
| PE(16:0_16:0)       | glycerophospholipids | Phosphatidylethanolamine                      | PE     |
| PE(16:0_16:1)       | glycerophospholipids | Phosphatidylethanolamine                      | PE     |
| PE(16:0_18:1)       | glycerophospholipids | Phosphatidylethanolamine                      | PE     |
| PE(16:0_18:2)       | glycerophospholipids | Phosphatidylethanolamine                      | PE     |
| PE(16:0_18:3) (a)   | glycerophospholipids | Phosphatidylethanolamine                      | PE     |
| PE(16:0_18:3) (b)   | glycerophospholipids | Phosphatidylethanolamine                      | PE     |
| PE(16:0_20:3)       | glycerophospholipids | Phosphatidylethanolamine                      | PE     |
| PE(16:0_20:4)       | glycerophospholipids | Phosphatidylethanolamine                      | PE     |
| PE(16:0_20:5)       | glycerophospholipids | Phosphatidylethanolamine                      | PE     |
| PE(16:0_22:6)       | glycerophospholipids | Phosphatidylethanolamine                      | PE     |
| PE(16:1_18:2)       | glycerophospholipids | Phosphatidylethanolamine                      | PE     |
| PE(16:1_20:4)       | glycerophospholipids | Phosphatidylethanolamine                      | PE     |
| PE(17:0_18:1)       | glycerophospholipids | Phosphatidylethanolamine                      | PE     |
| PE(17:0_18:2)       | glycerophospholipids | Phosphatidylethanolamine                      | PE     |
| PE(17:0_20:4)       | glycerophospholipids | Phosphatidylethanolamine                      | PE     |
| PE(17:0_22:6)       | glycerophospholipids | Phosphatidylethanolamine                      | PE     |
| PE(18:0_18:1)       | glycerophospholipids | Phosphatidylethanolamine                      | PE     |
| PE(18:0_18:2)       | glycerophospholipids | Phosphatidylethanolamine                      | PE     |
| PE(18:0_20:3) (a)   | glycerophospholipids | Phosphatidylethanolamine                      | PE     |
| PE(18:0_20:3) (b)   | glycerophospholipids | Phosphatidylethanolamine                      | PE     |
| PE(18:0_20:4)       | glycerophospholipids | Phosphatidylethanolamine                      | PE     |
| PE(18:0_22:4)       | glycerophospholipids | Phosphatidylethanolamine                      | PE     |
| PE(18:0_22:5) (n3)  | glycerophospholipids | Phosphatidylethanolamine                      | PE     |
| PE(18:0_22:5) (n6)  | glycerophospholipids | Phosphatidylethanolamine                      | PE     |
| PE(18:0_22:6)       | glycerophospholipids | Phosphatidylethanolamine                      | PE     |
| PE(18:1_18:1)       | glycerophospholipids | Phosphatidylethanolamine                      | PE     |
| PE(18:1_18:2)       | glycerophospholipids | Phosphatidylethanolamine                      | PE     |
| PE(18:1_22:6) (a)   | glycerophospholipids | Phosphatidylethanolamine                      | PE     |
| PE(18:1_22:6) (b)   | glycerophospholipids | Phosphatidylethanolamine                      | PE     |
| PE(20:0_20:4)       | glycerophospholipids | Phosphatidylethanolamine                      | PE     |
| PE(36:0)            | glycerophospholipids | Phosphatidylethanolamine                      | PE     |
| PE(38:5) (a)        | glycerophospholipids | Phosphatidylethanolamine                      | PE     |
| PE(38:5) (b)        | glycerophospholipids | Phosphatidylethanolamine                      | PE     |
| PE(O-16:0/18:2)     | glycerophospholipids | Alkylphosphatidylethanolamine                 | PE(O)  |
| PE(O-16:0/20:3)     | glycerophospholipids | Alkylphosphatidylethanolamine                 | PE(O)  |
| PE(O-16:0/20:4)     | glycerophospholipids | Alkylphosphatidylethanolamine                 | PE(O)  |
| PE(O-16:0/22:4)     | glycerophospholipids | Alkylphosphatidylethanolamine                 | PE(O)  |
| PE(O-16:0/22:6)     | glycerophospholipids | Alkylphosphatidylethanolamine                 | PE(O)  |
| PE(O-18:0/20:4)     | glycerophospholipids | Alkylphosphatidylethanolamine                 | PE(O)  |
| PE(O-18:0/22:5)     | glycerophospholipids | Alkylphosphatidylethanolamine                 | PE(O)  |
| PE(O-18:0/22:6)     | glycerophospholipids | Alkylphosphatidylethanolamine                 | PE(O)  |
| PE(O-18:1/18:2)     | glycerophospholipids | Alkylphosphatidylethanolamine                 | PE(O)  |
| PE(O-18:1/22:6)     | glycerophospholipids | Alkylphosphatidylethanolamine                 | PE(O)  |
| PE(O-34:1)          | glycerophospholipids | Alkylphosphatidylethanolamine                 | PE(O)  |
| PE(O-36:5)          | glycerophospholipids | Alkylphosphatidylethanolamine                 | PE(O)  |
| PE(O-38:5) (a)      | glycerophospholipids | Alkylphosphatidylethanolamine                 | PE(O)  |
| PE(O-38:5) (b)      | glycerophospholipids | Alkylphosphatidylethanolamine                 | PE(O)  |
| PE(P-15:0/20:4) (a) | glycerophospholipids | Alkenylphosphatidylethanolamine (plasmalogen) | PE(P)  |
| PE(P-15:0/20:4) (b) | glycerophospholipids | Alkenylphosphatidylethanolamine (plasmalogen) | PE(P)  |





|                                  |                      |                                                   |        |
|----------------------------------|----------------------|---------------------------------------------------|--------|
| LPE(20:4) [sn2]                  | glycerophospholipids | Lysophosphatidylethanolamine                      | LPE    |
| LPE(22:6) [sn1]                  | glycerophospholipids | Lysophosphatidylethanolamine                      | LPE    |
| LPE(22:6) [sn2]                  | glycerophospholipids | Lysophosphatidylethanolamine                      | LPE    |
| LPE(P-16:0)                      | glycerophospholipids | Lysoalkenylphosphatidylethanolamine (plasmalogen) | LPE(P) |
| LPE(P-18:0)                      | glycerophospholipids | Lysoalkenylphosphatidylethanolamine (plasmalogen) | LPE(P) |
| LPE(P-18:1)                      | glycerophospholipids | Lysoalkenylphosphatidylethanolamine (plasmalogen) | LPE(P) |
| LPE(P-20:0)                      | glycerophospholipids | Lysoalkenylphosphatidylethanolamine (plasmalogen) | LPE(P) |
| PI(38:5) (b)                     | glycerophospholipids | Phosphatidylinositol                              | PI     |
| PI(15-MHDA_18:1) & PI(17:0_18:1) | glycerophospholipids | Phosphatidylinositol                              | PI     |
| PI(15-MHDA_18:2) & PI(17:0_18:2) | glycerophospholipids | Phosphatidylinositol                              | PI     |
| PI(15-MHDA_20:4) & PI(17:0_20:4) | glycerophospholipids | Phosphatidylinositol                              | PI     |
| PI(16:0_16:1)                    | glycerophospholipids | Phosphatidylinositol                              | PI     |
| PI(16:0_20:3) (a)                | glycerophospholipids | Phosphatidylinositol                              | PI     |
| PI(16:0_20:3) (b)                | glycerophospholipids | Phosphatidylinositol                              | PI     |
| PI(16:0_20:4)                    | glycerophospholipids | Phosphatidylinositol                              | PI     |
| PI(16:0/16:0)                    | glycerophospholipids | Phosphatidylinositol                              | PI     |
| PI(18:0_18:1)                    | glycerophospholipids | Phosphatidylinositol                              | PI     |
| PI(18:0_20:2)                    | glycerophospholipids | Phosphatidylinositol                              | PI     |
| PI(18:0_20:3) (a)                | glycerophospholipids | Phosphatidylinositol                              | PI     |
| PI(18:0_20:3) (b)                | glycerophospholipids | Phosphatidylinositol                              | PI     |
| PI(18:0_20:4)                    | glycerophospholipids | Phosphatidylinositol                              | PI     |
| PI(18:0_22:4)                    | glycerophospholipids | Phosphatidylinositol                              | PI     |
| PI(18:0_22:5) (n3)               | glycerophospholipids | Phosphatidylinositol                              | PI     |
| PI(18:0_22:5) (n6)               | glycerophospholipids | Phosphatidylinositol                              | PI     |
| PI(18:0_22:6)                    | glycerophospholipids | Phosphatidylinositol                              | PI     |
| PI(18:1_18:2)                    | glycerophospholipids | Phosphatidylinositol                              | PI     |
| PI(20:0_20:4)                    | glycerophospholipids | Phosphatidylinositol                              | PI     |
| PI(34:0)                         | glycerophospholipids | Phosphatidylinositol                              | PI     |
| PI(34:1)                         | glycerophospholipids | Phosphatidylinositol                              | PI     |
| PI(36:2)                         | glycerophospholipids | Phosphatidylinositol                              | PI     |
| PI(37:6)                         | glycerophospholipids | Phosphatidylinositol                              | PI     |
| PI(38:5) (a)                     | glycerophospholipids | Phosphatidylinositol                              | PI     |
| PI(38:6)                         | glycerophospholipids | Phosphatidylinositol                              | PI     |
| PI(39:6)                         | glycerophospholipids | Phosphatidylinositol                              | PI     |
| PIP1(38:4)                       | glycerophospholipids | Phosphatidylinositol monophosphate                | PIP1   |
| LPI(18:0) [sn1]                  | glycerophospholipids | Lysophosphatidylinositol                          | LPI    |
| LPI(18:0) [sn2]                  | glycerophospholipids | Lysophosphatidylinositol                          | LPI    |
| LPI(18:1) [sn1]                  | glycerophospholipids | Lysophosphatidylinositol                          | LPI    |
| LPI(18:1) [sn2]                  | glycerophospholipids | Lysophosphatidylinositol                          | LPI    |
| LPI(18:2) [sn1]                  | glycerophospholipids | Lysophosphatidylinositol                          | LPI    |
| LPI(18:2) [sn2]                  | glycerophospholipids | Lysophosphatidylinositol                          | LPI    |
| LPI(20:4) [sn1]                  | glycerophospholipids | Lysophosphatidylinositol                          | LPI    |
| LPI(20:4) [sn2]                  | glycerophospholipids | Lysophosphatidylinositol                          | LPI    |
| PS(36:1)                         | glycerophospholipids | Phosphatidylserine                                | PS     |
| PS(36:2)                         | glycerophospholipids | Phosphatidylserine                                | PS     |
| PS(38:3)                         | glycerophospholipids | Phosphatidylserine                                | PS     |
| PS(38:4)                         | glycerophospholipids | Phosphatidylserine                                | PS     |
| PS(40:5)                         | glycerophospholipids | Phosphatidylserine                                | PS     |
| PS(40:6)                         | glycerophospholipids | Phosphatidylserine                                | PS     |
| PG(34:1)                         | glycerophospholipids | Phosphatidylglycerol                              | PG     |
| PG(36:1)                         | glycerophospholipids | Phosphatidylglycerol                              | PG     |
| PG(36:2)                         | glycerophospholipids | Phosphatidylglycerol                              | PG     |

|                   |               |                                 |             |
|-------------------|---------------|---------------------------------|-------------|
| CE(14:0)          | Neutral/Other | Cholesteryl ester               | CE          |
| CE(15:0)          | Neutral/Other | Cholesteryl ester               | CE          |
| CE(16:0)          | Neutral/Other | Cholesteryl ester               | CE          |
| CE(16:1)          | Neutral/Other | Cholesteryl ester               | CE          |
| CE(16:2)          | Neutral/Other | Cholesteryl ester               | CE          |
| CE(17:0)          | Neutral/Other | Cholesteryl ester               | CE          |
| CE(17:1)          | Neutral/Other | Cholesteryl ester               | CE          |
| CE(18:0)          | Neutral/Other | Cholesteryl ester               | CE          |
| CE(18:1)          | Neutral/Other | Cholesteryl ester               | CE          |
| CE(18:2)          | Neutral/Other | Cholesteryl ester               | CE          |
| CE(18:3)          | Neutral/Other | Cholesteryl ester               | CE          |
| CE(20:0)          | Neutral/Other | Cholesteryl ester               | CE          |
| CE(20:1)          | Neutral/Other | Cholesteryl ester               | CE          |
| CE(20:2)          | Neutral/Other | Cholesteryl ester               | CE          |
| CE(20:3)          | Neutral/Other | Cholesteryl ester               | CE          |
| CE(20:4)          | Neutral/Other | Cholesteryl ester               | CE          |
| CE(20:5)          | Neutral/Other | Cholesteryl ester               | CE          |
| CE(22:0)          | Neutral/Other | Cholesteryl ester               | CE          |
| CE(22:1)          | Neutral/Other | Cholesteryl ester               | CE          |
| CE(22:4)          | Neutral/Other | Cholesteryl ester               | CE          |
| CE(22:5)          | Neutral/Other | Cholesteryl ester               | CE          |
| CE(22:6)          | Neutral/Other | Cholesteryl ester               | CE          |
| CE(24:0)          | Neutral/Other | Cholesteryl ester               | CE          |
| CE(24:1)          | Neutral/Other | Cholesteryl ester               | CE          |
| CE(24:4)          | Neutral/Other | Cholesteryl ester               | CE          |
| CE(24:5)          | Neutral/Other | Cholesteryl ester               | CE          |
| CE(24:6)          | Neutral/Other | Cholesteryl ester               | CE          |
| COH               | Neutral/Other | Free Cholesterol                | COH         |
| DE(16:0)          | Neutral/Other | Dehydrocholesterol ester        | DE          |
| DE(18:1)          | Neutral/Other | Dehydrocholesterol ester        | DE          |
| DE(18:2)          | Neutral/Other | Dehydrocholesterol ester        | DE          |
| DE(20:4)          | Neutral/Other | Dehydrocholesterol ester        | DE          |
| DE(20:5)          | Neutral/Other | Dehydrocholesterol ester        | DE          |
| DE(22:6)          | Neutral/Other | Dehydrocholesterol ester        | DE          |
| deDE(18:2)        | Neutral/Other | Dehydrodemosterol ester         | deDE        |
| deDE(20:4)        | Neutral/Other | Dehydrodemosterol ester         | deDE        |
| methyl-CE(18:0)   | Neutral/Other | Methyl-cholesteryl ester        | methyl-CE   |
| methyl-CE(18:1)   | Neutral/Other | Methyl-cholesteryl ester        | methyl-CE   |
| methyl-CE(18:2)   | Neutral/Other | Methyl-cholesteryl ester        | methyl-CE   |
| methyl-CE(20:4)   | Neutral/Other | Methyl-cholesteryl ester        | methyl-CE   |
| methyl-CE(22:6)   | Neutral/Other | Methyl-cholesteryl ester        | methyl-CE   |
| methyl-DE(18:1)   | Neutral/Other | Methyl-dehydrocholesteryl ester | methyl-DE   |
| methyl-DE(18:2)   | Neutral/Other | Methyl-dehydrocholesteryl ester | methyl-DE   |
| dimethyl-CE(18:1) | Neutral/Other | Dimethyl-cholesteryl ester      | dimethyl-CE |
| dimethyl-CE(18:2) | Neutral/Other | Dimethyl-cholesteryl ester      | dimethyl-CE |
| dimethyl-CE(20:4) | Neutral/Other | Dimethyl-cholesteryl ester      | dimethyl-CE |
| dimethyl-CE(22:6) | Neutral/Other | Dimethyl-cholesteryl ester      | dimethyl-CE |
| FA(14:0)          | Neutral/Other | Free fatty acid                 | FFA         |
| FA(16:0)          | Neutral/Other | Free fatty acid                 | FFA         |
| FA(16:1)          | Neutral/Other | Free fatty acid                 | FFA         |
| FA(17:0)          | Neutral/Other | Free fatty acid                 | FFA         |
| FA(17:1)          | Neutral/Other | Free fatty acid                 | FFA         |
| FA(18:0)          | Neutral/Other | Free fatty acid                 | FFA         |
| FA(18:1)          | Neutral/Other | Free fatty acid                 | FFA         |
| FA(18:2)          | Neutral/Other | Free fatty acid                 | FFA         |
| FA(18:3)          | Neutral/Other | Free fatty acid                 | FFA         |
| FA(20:2)          | Neutral/Other | Free fatty acid                 | FFA         |

|               |               |                            |       |
|---------------|---------------|----------------------------|-------|
| FA(20:3)      | Neutral/Other | Free fatty acid            | FFA   |
| FA(20:4)      | Neutral/Other | Free fatty acid            | FFA   |
| FA(20:5)      | Neutral/Other | Free fatty acid            | FFA   |
| FA(22:4)      | Neutral/Other | Free fatty acid            | FFA   |
| FA(22:5)      | Neutral/Other | Free fatty acid            | FFA   |
| FA(22:6)      | Neutral/Other | Free fatty acid            | FFA   |
| AC(12:0)      | Neutral/Other | Acylcarnitine              | AC    |
| AC(12:1)      | Neutral/Other | Acylcarnitine              | AC    |
| AC(13:0)      | Neutral/Other | Acylcarnitine              | AC    |
| AC(14:0)      | Neutral/Other | Acylcarnitine              | AC    |
| AC(14:1)      | Neutral/Other | Acylcarnitine              | AC    |
| AC(14:2)      | Neutral/Other | Acylcarnitine              | AC    |
| AC(15:0) (a)  | Neutral/Other | Acylcarnitine              | AC    |
| AC(15:0) (b)  | Neutral/Other | Acylcarnitine              | AC    |
| AC(16:0)      | Neutral/Other | Acylcarnitine              | AC    |
| AC(16:1)      | Neutral/Other | Acylcarnitine              | AC    |
| AC(17:0) (a)  | Neutral/Other | Acylcarnitine              | AC    |
| AC(17:0) (b)  | Neutral/Other | Acylcarnitine              | AC    |
| AC(18:0)      | Neutral/Other | Acylcarnitine              | AC    |
| AC(18:1)      | Neutral/Other | Acylcarnitine              | AC    |
| AC(18:2)      | Neutral/Other | Acylcarnitine              | AC    |
| AC(18:3)      | Neutral/Other | Acylcarnitine              | AC    |
| AC(20:3) (a)  | Neutral/Other | Acylcarnitine              | AC    |
| AC(20:3) (b)  | Neutral/Other | Acylcarnitine              | AC    |
| AC(20:4)      | Neutral/Other | Acylcarnitine              | AC    |
| AC(20:5)      | Neutral/Other | Acylcarnitine              | AC    |
| AC(22:5)      | Neutral/Other | Acylcarnitine              | AC    |
| AC(22:6)      | Neutral/Other | Acylcarnitine              | AC    |
| AC(24:0)      | Neutral/Other | Acylcarnitine              | AC    |
| AC(24:1)      | Neutral/Other | Acylcarnitine              | AC    |
| AC(26:0)      | Neutral/Other | Acylcarnitine              | AC    |
| AC(26:1)      | Neutral/Other | Acylcarnitine              | AC    |
| AC(14:0)-OH   | Neutral/Other | Hydroxylated acylcarnitine | AC-OH |
| AC(14:1)-OH   | Neutral/Other | Hydroxylated acylcarnitine | AC-OH |
| AC(16:0)-OH   | Neutral/Other | Hydroxylated acylcarnitine | AC-OH |
| AC(16:1)-OH   | Neutral/Other | Hydroxylated acylcarnitine | AC-OH |
| AC(18:0)-OH   | Neutral/Other | Hydroxylated acylcarnitine | AC-OH |
| AC(18:1)-OH   | Neutral/Other | Hydroxylated acylcarnitine | AC-OH |
| AC(20:3)-OH   | Neutral/Other | Hydroxylated acylcarnitine | AC-OH |
| AC(22:5)-OH   | Neutral/Other | Hydroxylated acylcarnitine | AC-OH |
| AC(24:1)-OH   | Neutral/Other | Hydroxylated acylcarnitine | AC-OH |
| CA            | Neutral/Other | Bile acid                  | BA    |
| dxCA          | Neutral/Other | Bile acid                  | BA    |
| DG(14:0_16:0) | Neutral/Other | Diacylglycerol             | DG    |
| DG(14:0_18:2) | Neutral/Other | Diacylglycerol             | DG    |
| DG(16:0_16:0) | Neutral/Other | Diacylglycerol             | DG    |
| DG(16:0_16:1) | Neutral/Other | Diacylglycerol             | DG    |
| DG(16:0_18:1) | Neutral/Other | Diacylglycerol             | DG    |
| DG(16:0_18:2) | Neutral/Other | Diacylglycerol             | DG    |
| DG(16:0_20:4) | Neutral/Other | Diacylglycerol             | DG    |
| DG(16:0_22:5) | Neutral/Other | Diacylglycerol             | DG    |
| DG(16:0_22:6) | Neutral/Other | Diacylglycerol             | DG    |
| DG(16:1_18:1) | Neutral/Other | Diacylglycerol             | DG    |
| DG(18:0_18:1) | Neutral/Other | Diacylglycerol             | DG    |
| DG(18:0_18:2) | Neutral/Other | Diacylglycerol             | DG    |
| DG(18:0_20:4) | Neutral/Other | Diacylglycerol             | DG    |
| DG(18:1_18:1) | Neutral/Other | Diacylglycerol             | DG    |

|                    |               |                                                  |         |
|--------------------|---------------|--------------------------------------------------|---------|
| DG(18:1_18:2)      | Neutral/Other | Diacylglycerol                                   | DG      |
| DG(18:1_18:3)      | Neutral/Other | Diacylglycerol                                   | DG      |
| DG(18:1_20:3)      | Neutral/Other | Diacylglycerol                                   | DG      |
| DG(18:1_20:4)      | Neutral/Other | Diacylglycerol                                   | DG      |
| DG(18:1_20:5)      | Neutral/Other | Diacylglycerol                                   | DG      |
| DG(18:1_22:5)      | Neutral/Other | Diacylglycerol                                   | DG      |
| DG(18:1_22:6)      | Neutral/Other | Diacylglycerol                                   | DG      |
| DG(18:2_18:2)      | Neutral/Other | Diacylglycerol                                   | DG      |
| DG(18:2_20:4)      | Neutral/Other | Diacylglycerol                                   | DG      |
| DG(18:2_22:6)      | Neutral/Other | Diacylglycerol                                   | DG      |
| TG(48:0) [NL-16:0] | Neutral/Other | Triacylglycerol (neutral loss, for associations) | TG [NL] |
| TG(48:0) [NL-18:0] | Neutral/Other | Triacylglycerol (neutral loss, for associations) | TG [NL] |
| TG(48:1) [NL-16:1] | Neutral/Other | Triacylglycerol (neutral loss, for associations) | TG [NL] |
| TG(48:1) [NL-18:1] | Neutral/Other | Triacylglycerol (neutral loss, for associations) | TG [NL] |
| TG(48:2) [NL-14:0] | Neutral/Other | Triacylglycerol (neutral loss, for associations) | TG [NL] |
| TG(48:2) [NL-14:1] | Neutral/Other | Triacylglycerol (neutral loss, for associations) | TG [NL] |
| TG(48:2) [NL-16:1] | Neutral/Other | Triacylglycerol (neutral loss, for associations) | TG [NL] |
| TG(48:2) [NL-18:2] | Neutral/Other | Triacylglycerol (neutral loss, for associations) | TG [NL] |
| TG(48:3) [NL-14:0] | Neutral/Other | Triacylglycerol (neutral loss, for associations) | TG [NL] |
| TG(48:3) [NL-16:1] | Neutral/Other | Triacylglycerol (neutral loss, for associations) | TG [NL] |
| TG(48:3) [NL-18:3] | Neutral/Other | Triacylglycerol (neutral loss, for associations) | TG [NL] |
| TG(49:1) [NL-16:1] | Neutral/Other | Triacylglycerol (neutral loss, for associations) | TG [NL] |
| TG(49:1) [NL-17:1] | Neutral/Other | Triacylglycerol (neutral loss, for associations) | TG [NL] |
| TG(50:0) [NL-18:0] | Neutral/Other | Triacylglycerol (neutral loss, for associations) | TG [NL] |
| TG(50:1) [NL-14:0] | Neutral/Other | Triacylglycerol (neutral loss, for associations) | TG [NL] |
| TG(50:1) [NL-16:0] | Neutral/Other | Triacylglycerol (neutral loss, for associations) | TG [NL] |
| TG(50:1) [NL-18:1] | Neutral/Other | Triacylglycerol (neutral loss, for associations) | TG [NL] |
| TG(50:2) [NL-14:0] | Neutral/Other | Triacylglycerol (neutral loss, for associations) | TG [NL] |
| TG(50:2) [NL-16:1] | Neutral/Other | Triacylglycerol (neutral loss, for associations) | TG [NL] |
| TG(50:2) [NL-18:1] | Neutral/Other | Triacylglycerol (neutral loss, for associations) | TG [NL] |
| TG(50:2) [NL-18:2] | Neutral/Other | Triacylglycerol (neutral loss, for associations) | TG [NL] |
| TG(50:3) [NL-14:0] | Neutral/Other | Triacylglycerol (neutral loss, for associations) | TG [NL] |
| TG(50:3) [NL-14:1] | Neutral/Other | Triacylglycerol (neutral loss, for associations) | TG [NL] |

|                    |               |                                                  |         |
|--------------------|---------------|--------------------------------------------------|---------|
| TG(50:3) [NL-16:1] | Neutral/Other | Triacylglycerol (neutral loss, for associations) | TG [NL] |
| TG(50:3) [NL-18:2] | Neutral/Other | Triacylglycerol (neutral loss, for associations) | TG [NL] |
| TG(50:3) [NL-18:3] | Neutral/Other | Triacylglycerol (neutral loss, for associations) | TG [NL] |
| TG(50:4) [NL-14:0] | Neutral/Other | Triacylglycerol (neutral loss, for associations) | TG [NL] |
| TG(50:4) [NL-18:3] | Neutral/Other | Triacylglycerol (neutral loss, for associations) | TG [NL] |
| TG(50:4) [NL-20:4] | Neutral/Other | Triacylglycerol (neutral loss, for associations) | TG [NL] |
| TG(51:0) [NL-16:0] | Neutral/Other | Triacylglycerol (neutral loss, for associations) | TG [NL] |
| TG(51:1) [NL-17:0] | Neutral/Other | Triacylglycerol (neutral loss, for associations) | TG [NL] |
| TG(51:2) [NL-15:0] | Neutral/Other | Triacylglycerol (neutral loss, for associations) | TG [NL] |
| TG(51:2) [NL-17:0] | Neutral/Other | Triacylglycerol (neutral loss, for associations) | TG [NL] |
| TG(51:2) [NL-17:1] | Neutral/Other | Triacylglycerol (neutral loss, for associations) | TG [NL] |
| TG(52:1) [NL-18:0] | Neutral/Other | Triacylglycerol (neutral loss, for associations) | TG [NL] |
| TG(52:1) [NL-18:1] | Neutral/Other | Triacylglycerol (neutral loss, for associations) | TG [NL] |
| TG(52:2) [NL-16:0] | Neutral/Other | Triacylglycerol (neutral loss, for associations) | TG [NL] |
| TG(52:2) [NL-18:2] | Neutral/Other | Triacylglycerol (neutral loss, for associations) | TG [NL] |
| TG(52:3) [NL-16:1] | Neutral/Other | Triacylglycerol (neutral loss, for associations) | TG [NL] |
| TG(52:3) [NL-18:2] | Neutral/Other | Triacylglycerol (neutral loss, for associations) | TG [NL] |
| TG(52:4) [NL-16:1] | Neutral/Other | Triacylglycerol (neutral loss, for associations) | TG [NL] |
| TG(52:4) [NL-18:2] | Neutral/Other | Triacylglycerol (neutral loss, for associations) | TG [NL] |
| TG(52:4) [NL-18:3] | Neutral/Other | Triacylglycerol (neutral loss, for associations) | TG [NL] |
| TG(52:5) [NL-18:3] | Neutral/Other | Triacylglycerol (neutral loss, for associations) | TG [NL] |
| TG(52:5) [NL-20:4] | Neutral/Other | Triacylglycerol (neutral loss, for associations) | TG [NL] |
| TG(52:5) [NL-20:5] | Neutral/Other | Triacylglycerol (neutral loss, for associations) | TG [NL] |
| TG(53:2) [NL-17:1] | Neutral/Other | Triacylglycerol (neutral loss, for associations) | TG [NL] |
| TG(53:2) [NL-18:1] | Neutral/Other | Triacylglycerol (neutral loss, for associations) | TG [NL] |
| TG(54:0) [NL-18:0] | Neutral/Other | Triacylglycerol (neutral loss, for associations) | TG [NL] |
| TG(54:1) [NL-18:1] | Neutral/Other | Triacylglycerol (neutral loss, for associations) | TG [NL] |
| TG(54:2) [NL-18:0] | Neutral/Other | Triacylglycerol (neutral loss, for associations) | TG [NL] |

|                      |               |                                                      |            |
|----------------------|---------------|------------------------------------------------------|------------|
| TG(54:2) [NL-20:1]   | Neutral/Other | Triacylglycerol (neutral loss, for associations)     | TG [NL]    |
| TG(54:3) [NL-18:1]   | Neutral/Other | Triacylglycerol (neutral loss, for associations)     | TG [NL]    |
| TG(54:3) [NL-18:2]   | Neutral/Other | Triacylglycerol (neutral loss, for associations)     | TG [NL]    |
| TG(54:4) [NL-18:2]   | Neutral/Other | Triacylglycerol (neutral loss, for associations)     | TG [NL]    |
| TG(54:4) [NL-20:3]   | Neutral/Other | Triacylglycerol (neutral loss, for associations)     | TG [NL]    |
| TG(54:5) [NL-18:3]   | Neutral/Other | Triacylglycerol (neutral loss, for associations)     | TG [NL]    |
| TG(54:5) [NL-20:4]   | Neutral/Other | Triacylglycerol (neutral loss, for associations)     | TG [NL]    |
| TG(54:6) [NL-18:3]   | Neutral/Other | Triacylglycerol (neutral loss, for associations)     | TG [NL]    |
| TG(54:6) [NL-20:4]   | Neutral/Other | Triacylglycerol (neutral loss, for associations)     | TG [NL]    |
| TG(54:6) [NL-20:5]   | Neutral/Other | Triacylglycerol (neutral loss, for associations)     | TG [NL]    |
| TG(54:6) [NL-22:6]   | Neutral/Other | Triacylglycerol (neutral loss, for associations)     | TG [NL]    |
| TG(54:7) [NL-20:5]   | Neutral/Other | Triacylglycerol (neutral loss, for associations)     | TG [NL]    |
| TG(54:7) [NL-22:6]   | Neutral/Other | Triacylglycerol (neutral loss, for associations)     | TG [NL]    |
| TG(56:6) [NL-20:4]   | Neutral/Other | Triacylglycerol (neutral loss, for associations)     | TG [NL]    |
| TG(56:6) [NL-22:5]   | Neutral/Other | Triacylglycerol (neutral loss, for associations)     | TG [NL]    |
| TG(56:7) [NL-20:4]   | Neutral/Other | Triacylglycerol (neutral loss, for associations)     | TG [NL]    |
| TG(56:7) [NL-20:5]   | Neutral/Other | Triacylglycerol (neutral loss, for associations)     | TG [NL]    |
| TG(56:7) [NL-22:5]   | Neutral/Other | Triacylglycerol (neutral loss, for associations)     | TG [NL]    |
| TG(56:7) [NL-22:6]   | Neutral/Other | Triacylglycerol (neutral loss, for associations)     | TG [NL]    |
| TG(56:8) [NL-20:4]   | Neutral/Other | Triacylglycerol (neutral loss, for associations)     | TG [NL]    |
| TG(56:8) [NL-20:5]   | Neutral/Other | Triacylglycerol (neutral loss, for associations)     | TG [NL]    |
| TG(56:8) [NL-22:6]   | Neutral/Other | Triacylglycerol (neutral loss, for associations)     | TG [NL]    |
| TG(56:9) [NL-22:6]   | Neutral/Other | Triacylglycerol (neutral loss, for associations)     | TG [NL]    |
| TG(58:10) [NL-22:6]  | Neutral/Other | Triacylglycerol (neutral loss, for associations)     | TG [NL]    |
| TG(58:8) [NL-22:6]   | Neutral/Other | Triacylglycerol (neutral loss, for associations)     | TG [NL]    |
| TG(58:9) [NL-22:6]   | Neutral/Other | Triacylglycerol (neutral loss, for associations)     | TG [NL]    |
| TG(O-50:1) [NL-15:0] | Neutral/Other | Alkyldiacylglycerol (neutral loss, for associations) | TG(O) [NL] |
| TG(O-50:1) [NL-16:0] | Neutral/Other | Alkyldiacylglycerol (neutral loss, for associations) | TG(O) [NL] |

|                      |               |                                                      |            |
|----------------------|---------------|------------------------------------------------------|------------|
| TG(O-50:1) [NL-17:1] | Neutral/Other | Alkyldiacylglycerol (neutral loss, for associations) | TG(O) [NL] |
| TG(O-50:1) [NL-18:1] | Neutral/Other | Alkyldiacylglycerol (neutral loss, for associations) | TG(O) [NL] |
| TG(O-50:2) [NL-18:1] | Neutral/Other | Alkyldiacylglycerol (neutral loss, for associations) | TG(O) [NL] |
| TG(O-50:2) [NL-18:2] | Neutral/Other | Alkyldiacylglycerol (neutral loss, for associations) | TG(O) [NL] |
| TG(O-50:3) [NL-18:2] | Neutral/Other | Alkyldiacylglycerol (neutral loss, for associations) | TG(O) [NL] |
| TG(O-52:0) [NL-16:0] | Neutral/Other | Alkyldiacylglycerol (neutral loss, for associations) | TG(O) [NL] |
| TG(O-52:1) [NL-16:0] | Neutral/Other | Alkyldiacylglycerol (neutral loss, for associations) | TG(O) [NL] |
| TG(O-52:1) [NL-18:1] | Neutral/Other | Alkyldiacylglycerol (neutral loss, for associations) | TG(O) [NL] |
| TG(O-52:2) [NL-16:0] | Neutral/Other | Alkyldiacylglycerol (neutral loss, for associations) | TG(O) [NL] |
| TG(O-52:2) [NL-17:1] | Neutral/Other | Alkyldiacylglycerol (neutral loss, for associations) | TG(O) [NL] |
| TG(O-52:2) [NL-18:1] | Neutral/Other | Alkyldiacylglycerol (neutral loss, for associations) | TG(O) [NL] |
| TG(O-54:2) [NL-17:1] | Neutral/Other | Alkyldiacylglycerol (neutral loss, for associations) | TG(O) [NL] |
| TG(O-54:2) [NL-18:1] | Neutral/Other | Alkyldiacylglycerol (neutral loss, for associations) | TG(O) [NL] |
| TG(O-54:3) [NL-17:1] | Neutral/Other | Alkyldiacylglycerol (neutral loss, for associations) | TG(O) [NL] |
| TG(O-54:3) [NL-18:1] | Neutral/Other | Alkyldiacylglycerol (neutral loss, for associations) | TG(O) [NL] |
| TG(O-54:4) [NL-17:1] | Neutral/Other | Alkyldiacylglycerol (neutral loss, for associations) | TG(O) [NL] |
| TG(O-54:4) [NL-18:2] | Neutral/Other | Alkyldiacylglycerol (neutral loss, for associations) | TG(O) [NL] |
| Ubiquinone           | Neutral/Other | Ubiquinone                                           | Ubiquinone |
| CE(18:2) [+OH]       | Neutral/Other | Oxidised lipids                                      | OxSpecies  |
| CE(20:4) [+OH]       | Neutral/Other | Oxidised lipids                                      | OxSpecies  |
| CE(22:6) [+OH]       | Neutral/Other | Oxidised lipids                                      | OxSpecies  |
| LPC(18:2) [+OH]      | Neutral/Other | Oxidised lipids                                      | OxSpecies  |
| LPC(20:4) [+OH]      | Neutral/Other | Oxidised lipids                                      | OxSpecies  |
| LPC(22:6) [+OH]      | Neutral/Other | Oxidised lipids                                      | OxSpecies  |
| PC(34:2) [+OH]       | Neutral/Other | Oxidised lipids                                      | OxSpecies  |
| PC(36:4) [+OH]       | Neutral/Other | Oxidised lipids                                      | OxSpecies  |
