# Supplementary material for: Circulating lipid profiles are associated with cross-sectional and longitudinal changes of central biomarkers for Alzheimer’s disease
Source: PubMed Central journal article supplement — medRxiv. 2023 Jun 21:2023.06.12.23291054. Preprint. [Version 2] doi: 10.1101/2023.06.12.23291054 (PMC10312871; doi:10.1101/2023.06.12.23291054), 2023-06-21
Supplement: media-3.pdf [file media-3.pdf]

Supplementary Table 3. Associations of lipid classes with baseline A/T/N biomarkers

| Lipid classes | A: Amyloid PET (AV45) uptake |                |                |        |            | T: CSF pTau |                |                |        |            | N1: Hippocampal volume |                |                |        |            | N2: FDG uptake |                |                |        |            |
|---------------|------------------------------|----------------|----------------|--------|------------|-------------|----------------|----------------|--------|------------|------------------------|----------------|----------------|--------|------------|----------------|----------------|----------------|--------|------------|
|               | Beta                         | 95% CI (Lower) | 95% CI (Upper) | Pvalue | Pvalue(BH) | Beta        | 95% CI (Lower) | 95% CI (Upper) | Pvalue | Pvalue(BH) | Beta                   | 95% CI (Lower) | 95% CI (Upper) | Pvalue | Pvalue(BH) | Beta           | 95% CI (Lower) | 95% CI (Upper) | Pvalue | Pvalue(BH) |
| LPC(O)        | 0.121                        | 0.053          | 0.189          | 0.001  | 0.024      | 0.056       | -0.006         | 0.118          | 0.076  | 0.414      | -0.033                 | -0.085         | 0.019          | 0.211  | 0.649      | -0.111         | -0.175         | -0.047         | 0.001  | 0.011      |
| LPC           | 0.119                        | 0.047          | 0.192          | 0.001  | 0.030      | 0.064       | -0.001         | 0.128          | 0.054  | 0.414      | -0.012                 | -0.064         | 0.039          | 0.638  | 0.889      | -0.055         | -0.122         | 0.012          | 0.110  | 0.224      |
| LPC(P)        | 0.096                        | 0.027          | 0.165          | 0.006  | 0.047      | 0.049       | -0.012         | 0.111          | 0.115  | 0.414      | -0.009                 | -0.061         | 0.043          | 0.734  | 0.916      | -0.080         | -0.144         | -0.017         | 0.013  | 0.071      |
| LPE           | 0.104                        | 0.030          | 0.178          | 0.006  | 0.047      | 0.060       | -0.006         | 0.127          | 0.074  | 0.414      | -0.044                 | -0.095         | 0.006          | 0.086  | 0.360      | -0.070         | -0.139         | 0.000          | 0.048  | 0.137      |
| Hex2Cer       | 0.115                        | 0.035          | 0.194          | 0.005  | 0.047      | 0.062       | -0.009         | 0.132          | 0.085  | 0.414      | -0.030                 | -0.082         | 0.022          | 0.254  | 0.649      | -0.055         | -0.129         | 0.019          | 0.146  | 0.269      |
| DE            | -0.127                       | -0.213         | -0.041         | 0.004  | 0.047      | -0.077      | -0.153         | -0.002         | 0.045  | 0.414      | 0.029                  | -0.026         | 0.084          | 0.299  | 0.687      | 0.055          | -0.023         | 0.133          | 0.170  | 0.300      |
| PE(O)         | -0.095                       | -0.169         | -0.022         | 0.011  | 0.073      | -0.051      | -0.117         | 0.014          | 0.126  | 0.414      | 0.064                  | 0.014          | 0.113          | 0.012  | 0.094      | 0.014          | -0.054         | 0.082          | 0.689  | 0.754      |
| HexCer        | 0.089                        | 0.015          | 0.163          | 0.018  | 0.106      | 0.024       | -0.041         | 0.090          | 0.465  | 0.684      | -0.016                 | -0.065         | 0.033          | 0.515  | 0.845      | -0.018         | -0.086         | 0.051          | 0.609  | 0.700      |
| GM1           | 0.079                        | 0.007          | 0.150          | 0.030  | 0.148      | 0.003       | -0.059         | 0.065          | 0.921  | 0.935      | -0.056                 | -0.103         | -0.009         | 0.020  | 0.135      | -0.085         | -0.151         | -0.020         | 0.011  | 0.071      |
| PE(P)         | -0.082                       | -0.158         | -0.007         | 0.032  | 0.148      | -0.031      | -0.096         | 0.035          | 0.361  | 0.594      | 0.091                  | -0.040         | 0.142          | 0.001  | 0.008      | 0.022          | -0.046         | 0.090          | 0.528  | 0.639      |
| deDE          | 0.077                        | 0.002          | 0.152          | 0.045  | 0.174      | 0.070       | 0.004          | 0.136          | 0.038  | 0.414      | -0.149                 | -0.197         | -0.102         | 0.000  | 0.000      | -0.140         | -0.208         | -0.073         | 0.000  | 0.002      |
| dhCer         | -0.081                       | -0.160         | -0.002         | 0.045  | 0.174      | -0.038      | -0.108         | 0.031          | 0.279  | 0.584      | 0.034                  | -0.018         | 0.086          | 0.199  | 0.649      | 0.007          | -0.065         | 0.080          | 0.848  | 0.907      |
| OxSpecies     | 0.064                        | -0.008         | 0.135          | 0.082  | 0.291      | -0.010      | -0.074         | 0.053          | 0.752  | 0.805      | 0.009                  | -0.040         | 0.058          | 0.725  | 0.916      | -0.052         | -0.117         | 0.013          | 0.117  | 0.224      |
| GM3           | 0.058                        | -0.026         | 0.143          | 0.174  | 0.500      | 0.043       | -0.032         | 0.117          | 0.262  | 0.574      | -0.029                 | -0.091         | 0.033          | 0.355  | 0.743      | -0.136         | -0.213         | -0.058         | 0.001  | 0.011      |
| dimethyl-CE   | -0.052                       | -0.126         | 0.022          | 0.167  | 0.500      | -0.055      | -0.122         | 0.011          | 0.105  | 0.414      | 0.082                  | 0.032          | 0.131          | 0.001  | 0.014      | 0.083          | 0.015          | 0.151          | 0.017  | 0.078      |
| TG(O) [NL]    | -0.051                       | -0.123         | 0.020          | 0.157  | 0.500      | -0.050      | -0.114         | 0.014          | 0.125  | 0.414      | 0.119                  | 0.070          | 0.169          | 0.000  | 0.000      | 0.017          | -0.050         | 0.083          | 0.626  | 0.703      |
| S1P           | 0.044                        | -0.022         | 0.110          | 0.194  | 0.525      | 0.071       | 0.012          | 0.130          | 0.018  | 0.414      | -0.016                 | -0.062         | 0.030          | 0.497  | 0.845      | -0.022         | -0.083         | 0.040          | 0.490  | 0.633      |
| methyl-DE     | -0.045                       | -0.121         | 0.031          | 0.244  | 0.565      | -0.019      | -0.088         | 0.050          | 0.591  | 0.718      | 0.074                  | 0.023          | 0.124          | 0.004  | 0.039      | 0.097          | 0.027          | 0.168          | 0.007  | 0.071      |
| SHexCer       | 0.050                        | -0.034         | 0.134          | 0.246  | 0.565      | -0.023      | -0.097         | 0.051          | 0.543  | 0.718      | 0.003                  | -0.051         | 0.058          | 0.904  | 0.970      | -0.069         | -0.145         | 0.008          | 0.079  | 0.191      |
| LPI           | -0.042                       | -0.111         | 0.028          | 0.240  | 0.565      | 0.038       | -0.023         | 0.098          | 0.224  | 0.531      | 0.004                  | -0.044         | 0.051          | 0.878  | 0.970      | -0.030         | -0.094         | 0.034          | 0.350  | 0.520      |
| DG            | -0.066                       | -0.193         | 0.061          | 0.309  | 0.592      | -0.051      | -0.158         | 0.055          | 0.343  | 0.585      | -0.031                 | -0.114         | 0.052          | 0.465  | 0.822      | -0.125         | -0.235         | -0.015         | 0.026  | 0.085      |
| AC-OH         | -0.035                       | -0.100         | 0.031          | 0.298  | 0.592      | 0.008       | -0.050         | 0.067          | 0.781  | 0.817      | -0.012                 | -0.056         | 0.032          | 0.590  | 0.876      | -0.070         | -0.130         | -0.009         | 0.024  | 0.085      |
| Cer(d)        | 0.042                        | -0.036         | 0.120          | 0.292  | 0.592      | 0.047       | -0.023         | 0.117          | 0.184  | 0.498      | -0.013                 | -0.066         | 0.040          | 0.638  | 0.889      | -0.060         | -0.132         | 0.013          | 0.105  | 0.224      |
| SM            | -0.052                       | -0.147         | 0.044          | 0.291  | 0.592      | 0.024       | -0.060         | 0.107          | 0.577  | 0.718      | 0.073                  | 0.006          | 0.140          | 0.032  | 0.164      | -0.037         | -0.126         | 0.052          | 0.414  | 0.577      |
| COH           | 0.042                        | -0.045         | 0.129          | 0.344  | 0.633      | -0.003      | -0.077         | 0.071          | 0.935  | 0.935      | 0.007                  | -0.054         | 0.068          | 0.823  | 0.970      | -0.100         | -0.180         | -0.020         | 0.014  | 0.071      |
| Cer(m)        | -0.040                       | -0.125         | 0.046          | 0.361  | 0.639      | -0.026      | -0.100         | 0.048          | 0.490  | 0.684      | 0.003                  | -0.053         | 0.059          | 0.925  | 0.970      | -0.038         | -0.115         | 0.039          | 0.337  | 0.517      |
| PC(O)         | 0.032                        | -0.053         | 0.118          | 0.460  | 0.707      | 0.046       | -0.028         | 0.120          | 0.220  | 0.531      | 0.033                  | -0.027         | 0.093          | 0.285  | 0.687      | -0.081         | -0.158         | -0.004         | 0.040  | 0.124      |
| FFA           | -0.025                       | -0.093         | 0.042          | 0.461  | 0.707      | -0.013      | -0.073         | 0.048          | 0.683  | 0.786      | 0.000                  | -0.044         | 0.045          | 0.995  | 0.995      | -0.058         | -0.120         | 0.004          | 0.068  | 0.173      |
| PIP1          | 0.027                        | -0.038         | 0.092          | 0.416  | 0.707      | 0.050       | -0.008         | 0.108          | 0.093  | 0.414      | 0.012                  | -0.031         | 0.056          | 0.578  | 0.876      | 0.003          | -0.057         | 0.063          | 0.930  | 0.972      |
| LPE(P)        | 0.025                        | -0.042         | 0.092          | 0.458  | 0.707      | 0.016       | -0.043         | 0.076          | 0.587  | 0.718      | 0.019                  | -0.028         | 0.066          | 0.424  | 0.780      | 0.001          | -0.061         | 0.062          | 0.986  | 0.986      |
| CE            | 0.037                        | -0.072         | 0.145          | 0.510  | 0.711      | 0.067       | -0.026         | 0.160          | 0.156  | 0.447      | -0.012                 | -0.086         | 0.063          | 0.757  | 0.916      | -0.123         | -0.221         | -0.025         | 0.014  | 0.071      |
| PC            | 0.035                        | -0.067         | 0.136          | 0.504  | 0.711      | 0.078       | -0.009         | 0.165          | 0.077  | 0.414      | -0.022                 | -0.095         | 0.050          | 0.547  | 0.867      | -0.108         | -0.199         | -0.017         | 0.020  | 0.085      |
| Sph           | 0.022                        | -0.041         | 0.086          | 0.494  | 0.711      | -0.023      | -0.079         | 0.034          | 0.435  | 0.667      | 0.007                  | -0.036         | 0.050          | 0.746  | 0.916      | 0.020          | -0.039         | 0.079          | 0.509  | 0.633      |
| Ubiquinone    | -0.020                       | -0.087         | 0.046          | 0.548  | 0.741      | 0.021       | -0.038         | 0.080          | 0.490  | 0.684      | -0.005                 | -0.051         | 0.041          | 0.845  | 0.970      | -0.002         | -0.063         | 0.060          | 0.960  | 0.982      |
| PA            | 0.019                        | -0.053         | 0.092          | 0.602  | 0.785      | -0.010      | -0.074         | 0.053          | 0.751  | 0.805      | 0.024                  | -0.023         | 0.070          | 0.317  | 0.693      | 0.057          | -0.009         | 0.123          | 0.089  | 0.204      |
| PI            | -0.022                       | -0.107         | 0.063          | 0.614  | 0.785      | 0.063       | -0.013         | 0.139          | 0.103  | 0.414      | -0.002                 | -0.061         | 0.057          | 0.952  | 0.973      | -0.064         | -0.143         | 0.015          | 0.112  | 0.224      |
| BA            | -0.014                       | -0.078         | 0.051          | 0.671  | 0.835      | 0.030       | -0.028         | 0.087          | 0.311  | 0.585      | 0.025                  | -0.018         | 0.068          | 0.252  | 0.649      | 0.020          | -0.039         | 0.080          | 0.505  | 0.633      |
| methyl-CE     | -0.012                       | -0.086         | 0.061          | 0.745  | 0.865      | -0.012      | -0.078         | 0.055          | 0.735  | 0.805      | 0.055                  | 0.005          | 0.104          | 0.031  | 0.164      | 0.034          | -0.034         | 0.103          | 0.327  | 0.517      |
| C1P           | 0.014                        | -0.072         | 0.100          | 0.752  | 0.865      | 0.037       | -0.039         | 0.113          | 0.343  | 0.585      | 0.003                  | -0.054         | 0.059          | 0.928  | 0.970      | -0.039         | -0.116         | 0.038          | 0.324  | 0.517      |
| PS            | 0.012                        | -0.052         | 0.076          | 0.721  | 0.865      | 0.025       | -0.032         | 0.082          | 0.391  | 0.621      | -0.009                 | -0.051         | 0.033          | 0.686  | 0.916      | 0.017          | -0.042         | 0.076          | 0.567  | 0.668      |
| PE            | -0.013                       | -0.102         | 0.077          | 0.783  | 0.878      | 0.044       | -0.038         | 0.125          | 0.292  | 0.584      | -0.039                 | -0.101         | 0.023          | 0.219  | 0.649      | -0.053         | -0.137         | 0.030          | 0.210  | 0.358      |
| TG [NL]       | -0.013                       | -0.117         | 0.092          | 0.810  | 0.887      | 0.070       | -0.025         | 0.164          | 0.148  | 0.447      | -0.053                 | -0.128         | 0.022          | 0.169  | 0.649      | -0.116         | -0.216         | -0.016         | 0.024  | 0.085      |
| Hex3Cer       | -0.008                       | -0.100         | 0.083          | 0.861  | 0.922      | 0.022       | -0.059         | 0.103          | 0.593  | 0.718      | -0.026                 | -0.089         | 0.037          | 0.416  | 0.780      | -0.113         | -0.195         | -0.030         | 0.008  | 0.071      |
| AC            | 0.003                        | -0.063         | 0.070          | 0.924  | 0.945      | 0.029       | -0.031         | 0.089          | 0.340  | 0.585      | -0.019                 | -0.064         | 0.025          | 0.390  | 0.780      | -0.062         | -0.124         | 0.000          | 0.051  | 0.137      |
| PG            | -0.005                       | -0.109         | 0.099          | 0.922  | 0.945      | -0.057      | -0.149         | 0.036          | 0.231  | 0.531      | -0.042                 | -0.111         | 0.027          | 0.236  | 0.649      | -0.037         | -0.131         | 0.058          | 0.447  | 0.604      |
| PC(P)         | 0.001                        | -0.089         | 0.091          | 0.981  | 0.981      | 0.016       | -0.060         | 0.093          | 0.673  | 0.786      | 0.054                  | -0.005         | 0.114          | 0.074  | 0.340      | -0.037         | -0.116         | 0.042          | 0.364  | 0.523      |
