# Supplementary material for: Circulating lipid profiles are associated with cross-sectional and longitudinal changes of central biomarkers for Alzheimer’s disease
Source: PubMed Central journal article supplement — medRxiv. 2023 Jun 21:2023.06.12.23291054. Preprint. [Version 2] doi: 10.1101/2023.06.12.23291054 (PMC10312871; doi:10.1101/2023.06.12.23291054), 2023-06-21
Supplement: media-4.pdf [file media-4.pdf]

|     |    |                                                                                                                                                                                                                                                                                                                                                                                                                                                                                             |
|-----|----|---------------------------------------------------------------------------------------------------------------------------------------------------------------------------------------------------------------------------------------------------------------------------------------------------------------------------------------------------------------------------------------------------------------------------------------------------------------------------------------------|
| M16 | 19 | 50:2) [NL-18:1], TG(O-50:2) [NL-18:2], TG(O-50:3) [NL-18:2], TG(O-52:0) [NL-16:0], TG(O-52:1) [NL-16:0], TG(O-52:1) [NL-18:1], TG(O-52:2) [NL-16:0], TG(O-52:2) [NL-17:1], TG(O-52:2) [NL-18:1], TG(O-54:2) [NL-17:1], TG(O-54:2) [NL-18:1], TG(O-54:3) [NL-17:1], TG(O-54:3) [NL-18:1], TG(O-54:4) [NL-17:1], TG(O-54:4) [NL-18:2]                                                                                                                                                         |
| M17 | 12 | Cer(d19:1/24:0), Cer(d19:1/24:1), Cer(d19:1/26:0), Cer(d20:1/22:0), Cer(d20:1/23:0), Cer(d20:1/24:0), Cer(d20:1/24:1)                                                                                                                                                                                                                                                                                                                                                                       |
| M18 | 5  | CE(16:2), CE(18:3), DE(18:2), deDE(18:2), deDE(20:4)<br>HexCer(d18:1/16:0), HexCer(d18:1/18:0), HexCer(d18:1/20:0), HexCer(d18:1/22:0), HexCer(d18:1/24:0), HexCer(d18:1/24:1), HexCer(d18:2/18:0), HexCer(d18:2/20:0),                                                                                                                                                                                                                                                                     |
| M19 | 14 | HexCer(d18:2/22:0), HexCer(d18:2/24:0)                                                                                                                                                                                                                                                                                                                                                                                                                                                      |
| M20 | 6  | LPI(18:1) [sn1], LPI(18:1) [sn2], LPI(18:2) [sn1], LPI(18:2) [sn2], LPI(20:4) [sn1], LPI(20:4) [sn2]<br>LPC(22:4) [sn2], LPC(22:5) [sn1] (n6), LPE(20:4) [sn1], LPE(20:4) [sn2], PI(18:0_22:4), PI(18:0_22:5)                                                                                                                                                                                                                                                                               |
| M21 | 12 | (n6)                                                                                                                                                                                                                                                                                                                                                                                                                                                                                        |
| M22 | 6  | (b)                                                                                                                                                                                                                                                                                                                                                                                                                                                                                         |
| M23 | 12 | SM(d16:1/20:0), SM(d18:2/16:0), SM(d18:2/17:0), SM(d18:2/18:0), SM(d18:2/18:1), SM(d18:2/20:0)<br>36:5), PC(P-16:0/20:5), LPC(20:5) [sn1], LPC(20:5) [sn2], PE(16:0_20:5), PE(O-36:5), PE(P-15:0/22:6) (a), PE(P-16:0/20:5), PE(P-18:0/20:5), PE(P-18:1/20:5) (a), PE(P-18:1/20:5) (b),                                                                                                                                                                                                     |
| M24 | 23 | LPE(22:6) [sn1], LPE(22:6) [sn2], CE(20:5), DE(20:5), FA(20:5)                                                                                                                                                                                                                                                                                                                                                                                                                              |
| M25 | 7  | AC(15:0) (b), AC(16:0), AC(17:0) (a), AC(17:0) (b), AC(18:0), AC(24:1), AC(26:1)<br>AC(12:0), AC(12:1), AC(14:0), AC(14:1), AC(14:2), AC(16:1), AC(18:1), AC(14:0)-OH, AC(14:1)-OH,                                                                                                                                                                                                                                                                                                         |
| M26 | 14 | AC(16:0)-OH, AC(16:1)-OH, AC(18:0)-OH, AC(18:1)-OH, AC(20:3)-OH<br>Cer(m18:1/18:0), Cer(m18:1/20:0), Cer(m18:1/22:0), Cer(m18:1/23:0), Cer(m18:1/24:0),                                                                                                                                                                                                                                                                                                                                     |
| M27 | 11 | Cer(m18:1/24:1)                                                                                                                                                                                                                                                                                                                                                                                                                                                                             |
| M28 | 7  | SM(d19:1/24:1)                                                                                                                                                                                                                                                                                                                                                                                                                                                                              |
| M29 | 10 | DG(16:0_20:4), DG(18:0_20:4), DG(18:1_20:3), DG(18:1_20:4), DG(18:2_20:4), TG(52:5) [NL-20:4], TG(54:4) [NL-20:3], TG(54:5) [NL-20:4], TG(54:6) [NL-20:4], TG(56:8) [NL-20:4]<br>PC(28:0), PC(32:1), PC(32:2), LPC(14:0) [sn1], LPC(14:0) [sn2], PI(15-MHDA_18:1) & PI(17:0_18:1), PI(15-MHDA_20:4) & PI(17:0_20:4), PI(16:0_16:1), PI(16:0_20:3) (b), PI(16:0_20:4), PI(16:0/16:0), PI(18:0_18:1), PI(18:0_20:3) (b), PI(18:0_20:4), PI(34:0), PI(34:1), PI(38:5) (a), CE(14:0), CE(16:1), |
| M30 | 26 | PC(34:2) [+OH]                                                                                                                                                                                                                                                                                                                                                                                                                                                                              |
| M31 | 7  | CE(20:3)<br>S1P(d16:1), Cer(d16:1/16:0), Cer(d16:1/22:0), Cer(d16:1/23:0), Cer(d16:1/24:0), Cer(d16:1/24:1), Cer(d17:1/22:0), Cer(d17:1/23:0), Cer(d17:1/24:0), Cer(d17:1/24:1), Cer(d18:1/22:0), Cer(d18:1/23:0), Cer(d18:1/24:0), Cer(d18:1/24:1), Cer(d18:1/26:0), Cer(d18:2/22:0),                                                                                                                                                                                                      |
| M32 | 20 | Cer(d18:2/23:0), Cer(d18:2/24:0), Cer(d18:2/24:1), Cer(d18:2/26:0)<br>DG(16:0_22:5), DG(16:0_22:6), DG(18:1_20:5), DG(18:1_22:5), DG(18:1_22:6), DG(18:2_22:6), TG(52:5) [NL-20:5], TG(54:6) [NL-20:5], TG(54:6) [NL-22:6], TG(54:7) [NL-20:5], TG(54:7) [NL-22:6], TG(56:6) [NL-22:5], TG(56:7) [NL-20:5], TG(56:7) [NL-22:5], TG(56:7) [NL-22:6], TG(56:8) [NL-20:5], TG(56:8) [NL-22:6], TG(56:9) [NL-22:6], TG(58:10) [NL-22:6], TG(58:8) [NL-22:6],                                    |
| M33 | 30 | TG(58:9) [NL-22:6]<br>[sn2] (b), LPC(18:3) [sn1] (b), LPC(18:3) [sn2] (a), LPE(18:1) [sn1], LPE(18:1) [sn2], LPE(18:2) [sn1],                                                                                                                                                                                                                                                                                                                                                               |
| M34 | 11 | LPE(18:2) [sn2], LPC(18:2) [+OH]                                                                                                                                                                                                                                                                                                                                                                                                                                                            |
| M35 | 10 | PC(O-16:0/20:4), PC(O-18:0/20:4), PC(O-38:5), PC(O-40:5), PC(P-16:0/20:4), PC(P-18:0/20:4), PC(P-18:0/22:5), PC(P-20:0/20:4), PC(P-38:5) (a), PC(P-38:5) (b)<br>DG(16:0_18:2), DG(18:1_18:2), DG(18:1_18:3), DG(18:2_18:2), TG(52:3) [NL-16:1], TG(52:3) [NL-18:2], TG(52:4) [NL-16:1], TG(52:4) [NL-18:2], TG(52:5) [NL-18:3], TG(54:3) [NL-18:1], TG(54:3) [NL-18:2], TG(54:4) [NL-18:2], TG(54:5) [NL-18:3], TG(54:6) [NL-18:3]                                                          |
| M36 | 14 | [NL-18:2], TG(54:4) [NL-18:2], TG(54:5) [NL-18:3], TG(54:6) [NL-18:3]<br>dhCer(d18:0/16:0), dhCer(d18:0/18:0), dhCer(d18:0/20:0), dhCer(d18:0/22:0), dhCer(d18:0/24:0),                                                                                                                                                                                                                                                                                                                     |
| M37 | 8  | dhCer(d18:0/24:1), SM(41:0), SM(d18:0/22:0)<br>Hex2Cer(d18:1/22:0), Hex2Cer(d18:1/24:0), Hex2Cer(d18:1/24:1), Hex2Cer(d18:2/16:0),                                                                                                                                                                                                                                                                                                                                                          |
| M38 | 10 | Hex2Cer(d18:2/24:1), GM1(d18:1/16:0)                                                                                                                                                                                                                                                                                                                                                                                                                                                        |
| M39 | 8  | 20:0)                                                                                                                                                                                                                                                                                                                                                                                                                                                                                       |
| M40 | 10 | Sph(d18:1), S1P(d18:0), S1P(d18:1), S1P(d18:2), PS(36:1), PS(36:2), PS(38:3), PS(38:4), LPC(20:4) [+OH], LPC(22:6) [+OH]                                                                                                                                                                                                                                                                                                                                                                    |

|     |    |                                                                                                                                                                                                                                                                                                                                                                                                                                                                                                                                                                                                                                                                                                                                                                                                                                                                                                                                                                                                                                                                                                                                                                                                                                                                                                                                                                                                                                                                 |
|-----|----|-----------------------------------------------------------------------------------------------------------------------------------------------------------------------------------------------------------------------------------------------------------------------------------------------------------------------------------------------------------------------------------------------------------------------------------------------------------------------------------------------------------------------------------------------------------------------------------------------------------------------------------------------------------------------------------------------------------------------------------------------------------------------------------------------------------------------------------------------------------------------------------------------------------------------------------------------------------------------------------------------------------------------------------------------------------------------------------------------------------------------------------------------------------------------------------------------------------------------------------------------------------------------------------------------------------------------------------------------------------------------------------------------------------------------------------------------------------------|
| M41 | 19 | SM(d18:0/14:0), SM(d18:1/14:0) & SM(d16:1/16:0), SM(d18:2/14:0), PC(15-MHDA_18:1), PC(17:0_18:1), PC(31:0) (a), PC(31:0) (b), PC(33:0) (a), PC(33:0) (b), PC(33:1), PC(P-16:0/14:0),<br>CE(15:0), CE(17:0), CE(17:1)<br>Cer(d18:1/16:0), Cer(d18:2/16:0), Cer1P(d18:1/16:0), Hex3Cer(d18:1/16:0), Hex3Cer(d18:1/18:0),<br>Hex3Cer(d18:1/20:0), Hex3Cer(d18:1/22:0), Hex3Cer(d18:1/24:0), Hex3Cer(d18:1/24:1),<br>GM3(d18:1/16:0), GM3(d18:1/18:0), GM3(d18:1/22:0), GM3(d18:1/24:0), GM3(d18:1/24:1),<br>SHexCer(d18:1/16:0(OH)), SHexCer(d18:1/16:0), SHexCer(d18:1/24:1(OH)), SM(35:2) (b),<br>SM(d18:0/16:0), SM(d18:1/16:0), PC(15-MHDA_18:2), PC(15:0_20:3), PC(16:0_16:0),<br>PC(16:0_18:0), PC(16:0_18:2), PC(16:0_18:3) (a), PC(16:1_18:2), PC(17:0_18:2), PC(17:1_18:2),<br>PC(18:0_18:2), PC(18:1_18:1), PC(18:1_18:2), PC(18:2_18:2), PC(33:2), PC(38:2), PC(38:6) (a),<br>PC(40:8), PC(O-16:0/16:0), PC(O-16:0/20:3), PC(O-18:0/18:1), PC(O-18:0/18:2), PC(O-18:1/18:1),<br>PC(O-18:1/18:2), PC(O-34:1), PC(O-34:2), PC(O-36:0), PC(P-16:0/16:0), PC(P-16:0/16:1), PC(P-<br>16:0/18:0), PC(P-16:0/18:1), PC(P-16:0/18:2), PC(P-16:0/18:3), PC(P-18:0/18:2), PC(P-18:1/18:1),<br>62 PC(P-35:2) (a), PC(P-35:2) (b), PC(P-36:3), PI(18:0_20:2), CE(16:0), CE(18:1), CE(18:2), COH<br>PE(O-16:0/22:4), PE(P-16:0/22:4), PE(P-16:0/22:5) (n6), PE(P-18:0/22:4), PE(P-18:0/22:5) (n6),<br>M43 9 PE(P-18:1/22:4), PE(P-18:1/22:5) (b), CE(22:4), CE(22:5) |
| M44 | 11 | Cer(d18:1/19:0), Cer(d18:1/20:0), Cer(d18:1/21:0), Cer(d18:2/18:0), Cer(d18:2/20:0),<br>Cer(d18:2/21:0)<br>PC(18:1_22:6) (a), PC(18:1_22:6) (b), PC(38:7) (c), PC(39:5) (a), PC(44:12), PC(O-16:0/22:6), PC(O-<br>18:0/22:6), PC(P-16:0/22:6), PC(P-18:0/22:6), PC(P-18:1/22:6), LPC(22:6) [sn1], LPC(22:6) [sn2],<br>PE(O-16:0/22:6), PE(O-18:0/22:6), PE(O-18:1/22:6), PE(O-38:5) (b), PE(P-15:0/22:6) (b), PE(P-<br>16:0/22:6), PE(P-17:0/22:6) (a), PE(P-17:0/22:6) (b), PE(P-18:0/22:6), PE(P-18:1/22:6) (a), PE(P-<br>18:1/22:6) (b), PE(P-20:0/22:6), PE(P-20:1/22:6), PI(18:0_22:5) (n3), PI(18:0_22:6), PI(37:6),<br>M45 39 PI(38:6), PI(39:6), CE(22:6), DE(22:6), CE(22:6) [+OH]                                                                                                                                                                                                                                                                                                                                                                                                                                                                                                                                                                                                                                                                                                                                                                     |
| M46 | 8  | SHexCer(d18:1/24:1), SM(43:2) (b), SM(43:2) (c), SM(44:2), SM(44:3), SM(d16:1/24:1),<br>SM(d17:1/24:1), SM(d18:1/24:1)                                                                                                                                                                                                                                                                                                                                                                                                                                                                                                                                                                                                                                                                                                                                                                                                                                                                                                                                                                                                                                                                                                                                                                                                                                                                                                                                          |
