# Supplementary material for: Circulating lipid profiles are associated with cross-sectional and longitudinal changes of central biomarkers for Alzheimer’s disease
Source: PubMed Central journal article supplement — medRxiv. 2023 Jun 21:2023.06.12.23291054. Preprint. [Version 2] doi: 10.1101/2023.06.12.23291054 (PMC10312871; doi:10.1101/2023.06.12.23291054), 2023-06-21
Supplement: media-5.pdf [file media-5.pdf]

Supplementary Table 5. Associations of lipid correlation network modules with baseline A/T/N biomarkers

| Lipid modu | A: Amyloid PET (AV45) uptake |                |                |        |            | T: CSF pTau |                |                |        |            | N1: Hippocampal volume |                |                |        |            | N2: FDG uptake |                |                |        |            |
|------------|------------------------------|----------------|----------------|--------|------------|-------------|----------------|----------------|--------|------------|------------------------|----------------|----------------|--------|------------|----------------|----------------|----------------|--------|------------|
|            | Beta                         | 95% CI (Lower) | 95% CI (Upper) | Pvalue | Pvalue(BH) | Beta        | 95% CI (Lower) | 95% CI (Upper) | Pvalue | Pvalue(BH) | Beta                   | 95% CI (Lower) | 95% CI (Upper) | Pvalue | Pvalue(BH) | Beta           | 95% CI (Lower) | 95% CI (Upper) | Pvalue | Pvalue(BH) |
| M39        | 0.122                        | 0.053          | 0.192          | 0.001  | 0.026      | 0.053       | -0.010         | 0.116          | 0.100  | 0.229      | -0.037                 | -0.088         | 0.013          | 0.149  | 0.395      | -0.110         | -0.175         | -0.045         | 0.001  | 0.042      |
| M34        | 0.112                        | 0.043          | 0.180          | 0.001  | 0.033      | 0.079       | 0.018          | 0.141          | 0.011  | 0.102      | -0.014                 | -0.060         | 0.033          | 0.559  | 0.857      | -0.027         | -0.092         | 0.037          | 0.403  | 0.530      |
| M3         | 0.104                        | 0.033          | 0.174          | 0.004  | 0.047      | 0.048       | -0.015         | 0.111          | 0.135  | 0.239      | -0.009                 | -0.061         | 0.043          | 0.723  | 0.890      | -0.065         | -0.131         | 0.000          | 0.051  | 0.148      |
| M38        | 0.118                        | 0.038          | 0.198          | 0.004  | 0.047      | 0.058       | -0.012         | 0.129          | 0.104  | 0.229      | -0.036                 | -0.088         | 0.017          | 0.181  | 0.438      | -0.063         | -0.137         | 0.011          | 0.097  | 0.235      |
| M37        | -0.108                       | -0.188         | -0.028         | 0.008  | 0.075      | -0.049      | -0.119         | 0.021          | 0.171  | 0.271      | 0.058                  | 0.005          | 0.111          | 0.031  | 0.128      | 0.032          | -0.042         | 0.106          | 0.396  | 0.530      |
| M8         | -0.090                       | -0.160         | -0.020         | 0.012  | 0.090      | -0.059      | -0.121         | 0.002          | 0.060  | 0.188      | 0.068                  | 0.022          | 0.114          | 0.004  | 0.035      | 0.008          | -0.056         | 0.072          | 0.808  | 0.909      |
| M19        | 0.089                        | 0.015          | 0.163          | 0.018  | 0.121      | 0.024       | -0.041         | 0.090          | 0.465  | 0.578      | -0.016                 | -0.065         | 0.033          | 0.515  | 0.816      | -0.018         | -0.086         | 0.051          | 0.609  | 0.737      |
| M11        | 0.066                        | 0.001          | 0.132          | 0.047  | 0.271      | 0.055       | -0.004         | 0.113          | 0.068  | 0.196      | -0.024                 | -0.068         | 0.020          | 0.279  | 0.569      | -0.033         | -0.094         | 0.028          | 0.286  | 0.454      |
| M4         | 0.070                        | -0.001         | 0.141          | 0.055  | 0.279      | 0.070       | 0.008          | 0.133          | 0.028  | 0.143      | -0.059                 | -0.107         | -0.012         | 0.015  | 0.069      | -0.033         | -0.099         | 0.032          | 0.318  | 0.488      |
| M36        | 0.083                        | -0.005         | 0.170          | 0.064  | 0.292      | 0.056       | -0.024         | 0.137          | 0.169  | 0.271      | -0.028                 | -0.094         | 0.039          | 0.412  | 0.702      | -0.066         | -0.150         | 0.018          | 0.121  | 0.266      |
| M9         | -0.088                       | -0.188         | 0.012          | 0.085  | 0.292      | -0.001      | -0.088         | 0.087          | 0.984  | 0.984      | 0.103                  | 0.036          | 0.171          | 0.003  | 0.032      | 0.069          | -0.025         | 0.163          | 0.148  | 0.310      |
| M7         | 0.068                        | -0.008         | 0.144          | 0.081  | 0.292      | -0.006      | -0.074         | 0.062          | 0.859  | 0.919      | 0.028                  | -0.022         | 0.078          | 0.274  | 0.569      | 0.042          | -0.027         | 0.111          | 0.236  | 0.402      |
| M32        | 0.071                        | -0.010         | 0.151          | 0.085  | 0.292      | 0.056       | -0.016         | 0.127          | 0.125  | 0.239      | -0.011                 | -0.065         | 0.043          | 0.682  | 0.871      | -0.042         | -0.115         | 0.032          | 0.270  | 0.443      |
| M33        | -0.063                       | -0.136         | 0.010          | 0.089  | 0.292      | -0.079      | -0.143         | -0.014         | 0.018  | 0.135      | 0.030                  | -0.019         | 0.078          | 0.232  | 0.533      | 0.008          | -0.059         | 0.076          | 0.810  | 0.909      |
| M42        | 0.090                        | -0.022         | 0.203          | 0.115  | 0.352      | 0.083       | -0.011         | 0.178          | 0.083  | 0.214      | 0.018                  | -0.064         | 0.100          | 0.666  | 0.871      | -0.125         | -0.223         | -0.028         | 0.012  | 0.079      |
| M15        | -0.056                       | -0.131         | 0.019          | 0.143  | 0.410      | -0.008      | -0.074         | 0.059          | 0.821  | 0.910      | 0.079                  | 0.027          | 0.130          | 0.003  | 0.032      | 0.029          | -0.039         | 0.098          | 0.402  | 0.530      |
| M16        | -0.051                       | -0.123         | 0.020          | 0.157  | 0.412      | -0.050      | -0.114         | 0.014          | 0.125  | 0.239      | 0.119                  | 0.070          | 0.169          | 0.000  | 0.000      | 0.017          | -0.050         | 0.083          | 0.626  | 0.739      |
| M40        | 0.046                        | -0.018         | 0.109          | 0.161  | 0.412      | 0.055       | -0.003         | 0.112          | 0.061  | 0.188      | -0.016                 | -0.059         | 0.028          | 0.479  | 0.787      | -0.001         | -0.060         | 0.058          | 0.976  | 0.983      |
| M18        | 0.070                        | -0.040         | 0.181          | 0.211  | 0.477      | 0.112       | 0.017          | 0.207          | 0.021  | 0.135      | -0.138                 | -0.205         | -0.071         | 0.000  | 0.001      | -0.100         | -0.196         | -0.005         | 0.039  | 0.139      |
| M10        | -0.046                       | -0.116         | 0.025          | 0.202  | 0.477      | 0.001       | -0.060         | 0.063          | 0.966  | 0.984      | 0.058                  | 0.012          | 0.105          | 0.014  | 0.069      | -0.004         | -0.068         | 0.060          | 0.895  | 0.980      |
| M45        | -0.049                       | -0.126         | 0.029          | 0.218  | 0.477      | -0.105      | -0.173         | -0.038         | 0.002  | 0.053      | 0.069                  | 0.017          | 0.121          | 0.009  | 0.054      | 0.002          | -0.068         | 0.072          | 0.952  | 0.983      |
| M20        | -0.039                       | -0.107         | 0.029          | 0.260  | 0.543      | 0.046       | -0.014         | 0.105          | 0.135  | 0.239      | 0.007                  | -0.040         | 0.054          | 0.775  | 0.891      | -0.045         | -0.108         | 0.018          | 0.160  | 0.317      |
| M21        | 0.035                        | -0.040         | 0.109          | 0.361  | 0.554      | 0.113       | 0.047          | 0.178          | 0.001  | 0.036      | -0.041                 | -0.094         | 0.011          | 0.123  | 0.378      | -0.101         | -0.170         | -0.031         | 0.005  | 0.077      |
| M43        | -0.037                       | -0.111         | 0.037          | 0.331  | 0.554      | 0.091       | 0.025          | 0.156          | 0.007  | 0.080      | 0.000                  | -0.054         | 0.054          | 0.996  | 0.996      | -0.083         | -0.152         | -0.014         | 0.018  | 0.104      |
| M12        | -0.036                       | -0.111         | 0.039          | 0.345  | 0.554      | -0.032      | -0.100         | 0.036          | 0.356  | 0.468      | 0.073                  | 0.023          | 0.123          | 0.005  | 0.035      | 0.070          | 0.001          | 0.140          | 0.047  | 0.146      |
| M13        | 0.053                        | -0.046         | 0.151          | 0.293  | 0.554      | 0.023       | -0.062         | 0.108          | 0.594  | 0.683      | 0.011                  | -0.053         | 0.075          | 0.741  | 0.890      | -0.081         | -0.170         | 0.009          | 0.077  | 0.197      |
| M27        | -0.040                       | -0.125         | 0.046          | 0.361  | 0.554      | -0.026      | -0.100         | 0.048          | 0.490  | 0.593      | 0.003                  | -0.053         | 0.059          | 0.925  | 0.967      | -0.038         | -0.115         | 0.039          | 0.337  | 0.493      |
| M24        | -0.037                       | -0.111         | 0.037          | 0.326  | 0.554      | -0.066      | -0.133         | 0.001          | 0.053  | 0.188      | 0.013                  | -0.037         | 0.062          | 0.616  | 0.864      | 0.022          | -0.047         | 0.091          | 0.534  | 0.682      |
| M28        | -0.034                       | -0.106         | 0.038          | 0.351  | 0.554      | -0.002      | -0.065         | 0.062          | 0.962  | 0.984      | 0.064                  | 0.016          | 0.112          | 0.009  | 0.054      | 0.019          | -0.049         | 0.087          | 0.583  | 0.725      |
| M22        | -0.041                       | -0.122         | 0.040          | 0.324  | 0.554      | -0.077      | -0.150         | -0.004         | 0.038  | 0.174      | 0.014                  | -0.041         | 0.069          | 0.620  | 0.864      | -0.001         | -0.076         | 0.074          | 0.983  | 0.983      |
| M14        | 0.032                        | -0.046         | 0.110          | 0.417  | 0.619      | 0.102       | 0.032          | 0.171          | 0.004  | 0.064      | -0.012                 | -0.067         | 0.043          | 0.676  | 0.871      | -0.077         | -0.148         | -0.005         | 0.036  | 0.136      |
| M5         | -0.024                       | -0.091         | 0.043          | 0.487  | 0.700      | -0.007      | -0.067         | 0.054          | 0.831  | 0.910      | -0.003                 | -0.048         | 0.041          | 0.886  | 0.948      | -0.063         | -0.125         | -0.001         | 0.048  | 0.146      |
| M26        | -0.020                       | -0.085         | 0.045          | 0.549  | 0.765      | 0.030       | -0.028         | 0.089          | 0.309  | 0.431      | -0.021                 | -0.065         | 0.023          | 0.339  | 0.624      | -0.080         | -0.141         | -0.019         | 0.010  | 0.077      |
| M23        | -0.023                       | -0.110         | 0.064          | 0.600  | 0.812      | 0.072       | -0.002         | 0.146          | 0.057  | 0.188      | 0.005                  | -0.058         | 0.068          | 0.867  | 0.948      | -0.102         | -0.179         | -0.024         | 0.010  | 0.077      |
| M29        | -0.022                       | -0.113         | 0.068          | 0.628  | 0.826      | 0.038       | -0.042         | 0.118          | 0.354  | 0.468      | 0.000                  | -0.063         | 0.062          | 0.990  | 0.996      | -0.081         | -0.166         | 0.004          | 0.061  | 0.166      |
| M31        | 0.019                        | -0.063         | 0.101          | 0.655  | 0.837      | 0.081       | 0.010          | 0.151          | 0.026  | 0.143      | 0.042                  | -0.015         | 0.100          | 0.150  | 0.395      | -0.001         | -0.077         | 0.074          | 0.971  | 0.983      |
| M41        | 0.015                        | -0.068         | 0.097          | 0.724  | 0.900      | 0.054       | -0.019         | 0.127          | 0.144  | 0.246      | -0.015                 | -0.070         | 0.041          | 0.604  | 0.864      | -0.050         | -0.126         | 0.026          | 0.196  | 0.347      |
| M44        | 0.012                        | -0.063         | 0.087          | 0.748  | 0.905      | 0.042       | -0.025         | 0.109          | 0.219  | 0.324      | -0.024                 | -0.074         | 0.027          | 0.362  | 0.641      | -0.049         | -0.119         | 0.020          | 0.165  | 0.317      |
| M35        | -0.006                       | -0.086         | 0.074          | 0.887  | 0.913      | 0.055       | -0.014         | 0.125          | 0.118  | 0.239      | 0.031                  | -0.026         | 0.087          | 0.284  | 0.569      | -0.098         | -0.170         | -0.026         | 0.008  | 0.077      |
| M6         | -0.010                       | -0.086         | 0.065          | 0.788  | 0.913      | 0.058       | -0.008         | 0.124          | 0.084  | 0.214      | -0.008                 | -0.060         | 0.044          | 0.755  | 0.890      | -0.095         | -0.165         | -0.026         | 0.007  | 0.077      |
| M2         | -0.009                       | -0.116         | 0.097          | 0.862  | 0.913      | 0.062       | -0.034         | 0.159          | 0.204  | 0.313      | -0.067                 | -0.142         | 0.008          | 0.081  | 0.294      | -0.116         | -0.218         | -0.015         | 0.025  | 0.114      |
| M30        | 0.006                        | -0.080         | 0.092          | 0.890  | 0.913      | 0.079       | 0.003          | 0.155          | 0.042  | 0.174      | -0.046                 | -0.105         | 0.013          | 0.123  | 0.378      | -0.093         | -0.173         | -0.013         | 0.023  | 0.114      |
| M25        | -0.006                       | -0.073         | 0.062          | 0.868  | 0.913      | 0.023       | -0.037         | 0.084          | 0.451  | 0.576      | -0.023                 | -0.068         | 0.022          | 0.319  | 0.612      | -0.069         | -0.132         | -0.007         | 0.030  | 0.127      |
| M17        | 0.006                        | -0.062         | 0.075          | 0.855  | 0.913      | 0.017       | -0.044         | 0.078          | 0.585  | 0.683      | 0.005                  | -0.041         | 0.051          | 0.832  | 0.934      | -0.052         | -0.115         | 0.011          | 0.106  | 0.244      |
| M1         | -0.006                       | -0.093         | 0.081          | 0.893  | 0.913      | 0.066       | -0.014         | 0.145          | 0.105  | 0.229      | -0.044                 | -0.105         | 0.017          | 0.155  | 0.395      | -0.057         | -0.139         | 0.025          | 0.174  | 0.320      |
| M46        | 0.002                        | -0.086         | 0.089          | 0.968  | 0.968      | -0.045      | -0.121         | 0.032          | 0.251  | 0.361      | 0.050                  | -0.007         | 0.108          | 0.083  | 0.294      | -0.039         | -0.121         | 0.042          | 0.343  | 0.493      |
