# Supplementary material for: Circulating lipid profiles are associated with cross-sectional and longitudinal changes of central biomarkers for Alzheimer’s disease
Source: PubMed Central journal article supplement — medRxiv. 2023 Jun 21:2023.06.12.23291054. Preprint. [Version 2] doi: 10.1101/2023.06.12.23291054 (PMC10312871; doi:10.1101/2023.06.12.23291054), 2023-06-21
Supplement: media-7.pdf [file media-7.pdf]

Supplementary Table 7. Associations of lipid classes with longitudinal A/T/N biomarkers

| Lipid classes | A: Amyloid PET (AV45) uptake |                |                |        |            | T: CSF pTau |                |                |        |            | N1: Hippocampal volume |                |                |        |            | N2: FDG uptake |                |                |        |            |
|---------------|------------------------------|----------------|----------------|--------|------------|-------------|----------------|----------------|--------|------------|------------------------|----------------|----------------|--------|------------|----------------|----------------|----------------|--------|------------|
|               | Beta                         | 95% CI (Lower) | 95% CI (Upper) | Pvalue | Pvalue(BH) | Beta        | 95% CI (Lower) | 95% CI (Upper) | Pvalue | Pvalue(BH) | Beta                   | 95% CI (Lower) | 95% CI (Upper) | Pvalue | Pvalue(BH) | Beta           | 95% CI (Lower) | 95% CI (Upper) | Pvalue | Pvalue(BH) |
| GM3           | -0.007                       | -0.029         | 0.015          | 0.543  | 0.901      | -0.011      | -0.026         | 0.003          | 0.116  | 0.382      | -0.022                 | -0.032         | -0.011         | 0.000  | 0.002      | -0.065         | -0.092         | -0.038         | 0.000  | 0.000      |
| GM1           | 0.003                        | -0.020         | 0.025          | 0.823  | 0.901      | -0.018      | -0.032         | -0.003         | 0.015  | 0.221      | -0.015                 | -0.026         | -0.005         | 0.005  | 0.063      | -0.060         | -0.089         | -0.032         | 0.000  | 0.001      |
| deDE          | -0.001                       | -0.024         | 0.022          | 0.929  | 0.929      | 0.000       | -0.014         | 0.015          | 0.952  | 0.973      | -0.027                 | -0.038         | -0.016         | 0.000  | 0.000      | -0.057         | -0.086         | -0.029         | 0.000  | 0.001      |
| Hex3Cer       | -0.005                       | -0.027         | 0.017          | 0.681  | 0.901      | -0.008      | -0.022         | 0.006          | 0.261  | 0.512      | -0.013                 | -0.024         | -0.002         | 0.021  | 0.138      | -0.050         | -0.077         | -0.023         | 0.000  | 0.004      |
| PC            | -0.011                       | -0.033         | 0.012          | 0.352  | 0.901      | -0.013      | -0.027         | 0.001          | 0.063  | 0.241      | -0.006                 | -0.017         | 0.005          | 0.296  | 0.524      | -0.045         | -0.072         | -0.018         | 0.001  | 0.011      |
| AC            | -0.003                       | -0.025         | 0.019          | 0.798  | 0.901      | -0.014      | -0.028         | -0.001         | 0.041  | 0.224      | -0.013                 | -0.023         | -0.002         | 0.020  | 0.138      | -0.044         | -0.070         | -0.017         | 0.002  | 0.012      |
| SM            | -0.003                       | -0.025         | 0.019          | 0.763  | 0.901      | -0.006      | -0.019         | 0.008          | 0.437  | 0.669      | -0.004                 | -0.015         | 0.007          | 0.466  | 0.650      | -0.042         | -0.069         | -0.016         | 0.002  | 0.013      |
| LPC(O)        | -0.010                       | -0.032         | 0.012          | 0.365  | 0.901      | -0.020      | -0.033         | -0.006         | 0.006  | 0.221      | -0.019                 | -0.029         | -0.008         | 0.001  | 0.011      | -0.041         | -0.068         | -0.013         | 0.004  | 0.019      |
| COH           | -0.005                       | -0.027         | 0.017          | 0.644  | 0.901      | -0.003      | -0.017         | 0.011          | 0.666  | 0.901      | -0.005                 | -0.016         | 0.006          | 0.332  | 0.566      | -0.040         | -0.067         | -0.013         | 0.004  | 0.019      |
| CE            | -0.002                       | -0.024         | 0.021          | 0.895  | 0.919      | -0.002      | -0.024         | 0.012          | 0.798  | 0.973      | -0.008                 | -0.019         | 0.003          | 0.139  | 0.343      | -0.039         | -0.066         | -0.012         | 0.005  | 0.025      |
| PC(O)         | -0.010                       | -0.032         | 0.012          | 0.360  | 0.901      | -0.008      | -0.022         | 0.006          | 0.274  | 0.512      | -0.005                 | -0.015         | 0.006          | 0.408  | 0.608      | -0.036         | -0.062         | -0.009         | 0.009  | 0.038      |
| PIP1          | -0.006                       | -0.028         | 0.016          | 0.601  | 0.901      | -0.007      | -0.021         | 0.006          | 0.290  | 0.512      | -0.008                 | -0.018         | 0.003          | 0.159  | 0.366      | -0.035         | -0.062         | -0.008         | 0.011  | 0.040      |
| Cer(d)        | -0.011                       | -0.033         | 0.011          | 0.342  | 0.901      | -0.011      | -0.025         | 0.003          | 0.134  | 0.412      | -0.007                 | -0.018         | 0.004          | 0.208  | 0.415      | -0.034         | -0.061         | -0.006         | 0.016  | 0.058      |
| Hex2Cer       | -0.002                       | -0.024         | 0.020          | 0.877  | 0.919      | -0.001      | -0.015         | 0.013          | 0.881  | 0.973      | -0.012                 | -0.023         | -0.002         | 0.024  | 0.138      | -0.032         | -0.059         | -0.005         | 0.022  | 0.068      |
| AC-OH         | -0.003                       | -0.025         | 0.019          | 0.802  | 0.901      | -0.007      | -0.021         | 0.006          | 0.300  | 0.512      | -0.005                 | -0.015         | 0.006          | 0.409  | 0.608      | -0.032         | -0.060         | -0.005         | 0.022  | 0.068      |
| HexCer        | 0.008                        | -0.014         | 0.030          | 0.467  | 0.901      | -0.008      | -0.022         | 0.005          | 0.230  | 0.495      | -0.013                 | -0.024         | -0.003         | 0.016  | 0.138      | -0.031         | -0.058         | -0.003         | 0.028  | 0.079      |
| LPE           | -0.020                       | -0.042         | 0.002          | 0.078  | 0.901      | -0.016      | -0.029         | -0.002         | 0.024  | 0.221      | -0.012                 | -0.023         | -0.001         | 0.030  | 0.153      | -0.030         | -0.058         | -0.003         | 0.029  | 0.079      |
| PI            | -0.020                       | -0.042         | 0.002          | 0.077  | 0.901      | -0.012      | -0.026         | 0.002          | 0.099  | 0.351      | -0.005                 | -0.016         | 0.006          | 0.354  | 0.582      | -0.029         | -0.056         | -0.002         | 0.035  | 0.088      |
| LPC           | -0.007                       | -0.029         | 0.015          | 0.557  | 0.901      | -0.014      | -0.027         | 0.000          | 0.050  | 0.232      | -0.011                 | -0.022         | -0.001         | 0.041  | 0.170      | -0.028         | -0.055         | 0.000          | 0.048  | 0.114      |
| SHexCer       | -0.005                       | -0.027         | 0.018          | 0.679  | 0.901      | -0.007      | -0.021         | 0.007          | 0.346  | 0.562      | -0.007                 | -0.018         | 0.004          | 0.200  | 0.415      | -0.028         | -0.056         | 0.000          | 0.050  | 0.114      |
| LPE(P)        | -0.004                       | -0.026         | 0.018          | 0.717  | 0.901      | -0.007      | -0.021         | 0.008          | 0.355  | 0.562      | -0.008                 | -0.019         | 0.003          | 0.139  | 0.343      | -0.026         | -0.053         | 0.002          | 0.067  | 0.147      |
| C1P           | -0.004                       | -0.025         | 0.018          | 0.747  | 0.901      | -0.001      | -0.015         | 0.013          | 0.898  | 0.973      | -0.010                 | -0.021         | 0.000          | 0.061  | 0.216      | -0.025         | -0.053         | 0.003          | 0.078  | 0.163      |
| LPC(P)        | -0.009                       | -0.031         | 0.013          | 0.424  | 0.901      | -0.010      | -0.024         | 0.004          | 0.162  | 0.467      | -0.011                 | -0.022         | 0.000          | 0.048  | 0.182      | -0.024         | -0.051         | 0.003          | 0.087  | 0.174      |
| S1P           | -0.007                       | -0.029         | 0.015          | 0.514  | 0.901      | -0.008      | -0.022         | 0.006          | 0.237  | 0.495      | -0.008                 | -0.019         | 0.003          | 0.142  | 0.343      | -0.023         | -0.050         | 0.004          | 0.098  | 0.187      |
| PC(P)         | -0.007                       | -0.029         | 0.015          | 0.534  | 0.901      | -0.008      | -0.022         | 0.006          | 0.280  | 0.512      | 0.001                  | -0.010         | 0.012          | 0.852  | 0.945      | -0.020         | -0.047         | 0.007          | 0.152  | 0.279      |
| DE            | 0.013                        | -0.009         | 0.035          | 0.240  | 0.901      | 0.009       | -0.004         | 0.023          | 0.178  | 0.482      | -0.009                 | -0.020         | 0.002          | 0.094  | 0.281      | -0.020         | -0.048         | 0.008          | 0.159  | 0.282      |
| TG(O) [NL]    | -0.012                       | -0.034         | 0.009          | 0.264  | 0.901      | -0.004      | -0.034         | 0.009          | 0.544  | 0.807      | 0.010                  | -0.001         | 0.020          | 0.079  | 0.260      | 0.017          | -0.011         | 0.044          | 0.240  | 0.409      |
| OxSpecies     | -0.005                       | -0.027         | 0.018          | 0.692  | 0.901      | -0.009      | -0.023         | 0.005          | 0.203  | 0.491      | -0.009                 | -0.020         | 0.002          | 0.098  | 0.281      | -0.016         | -0.044         | 0.012          | 0.250  | 0.411      |
| PE            | -0.016                       | -0.037         | 0.006          | 0.166  | 0.901      | -0.015      | -0.029         | -0.001         | 0.032  | 0.224      | -0.003                 | -0.014         | 0.008          | 0.582  | 0.765      | -0.015         | -0.043         | 0.012          | 0.282  | 0.448      |
| Sph           | 0.011                        | -0.011         | 0.033          | 0.317  | 0.901      | -0.009      | -0.022         | 0.005          | 0.229  | 0.495      | 0.001                  | -0.010         | 0.012          | 0.791  | 0.933      | 0.014          | -0.013         | 0.041          | 0.308  | 0.472      |
| PE(P)         | -0.007                       | -0.029         | 0.015          | 0.528  | 0.901      | 0.000       | -0.015         | 0.014          | 0.951  | 0.973      | 0.007                  | -0.004         | 0.018          | 0.201  | 0.415      | -0.013         | -0.041         | 0.014          | 0.329  | 0.474      |
| dimethyl-CE   | 0.013                        | -0.009         | 0.036          | 0.241  | 0.901      | 0.001       | -0.013         | 0.015          | 0.923  | 0.973      | 0.000                  | -0.011         | 0.011          | 0.981  | 0.981      | -0.014         | -0.041         | 0.014          | 0.327  | 0.474      |
| methyl-CE     | 0.012                        | -0.010         | 0.035          | 0.279  | 0.901      | 0.003       | -0.011         | 0.017          | 0.646  | 0.900      | -0.002                 | -0.012         | 0.009          | 0.763  | 0.923      | -0.012         | -0.040         | 0.016          | 0.392  | 0.547      |
| Ubiquinone    | 0.007                        | -0.015         | 0.029          | 0.511  | 0.901      | -0.004      | -0.018         | 0.010          | 0.577  | 0.830      | -0.004                 | -0.015         | 0.006          | 0.431  | 0.620      | -0.010         | -0.038         | 0.017          | 0.464  | 0.628      |
| TG [NL]       | -0.019                       | -0.041         | 0.002          | 0.083  | 0.901      | -0.016      | -0.029         | -0.002         | 0.023  | 0.221      | 0.001                  | -0.010         | 0.011          | 0.896  | 0.958      | -0.009         | -0.037         | 0.019          | 0.539  | 0.708      |
| DG            | -0.015                       | -0.037         | 0.007          | 0.188  | 0.901      | -0.013      | -0.027         | 0.000          | 0.059  | 0.241      | 0.001                  | -0.009         | 0.012          | 0.829  | 0.945      | -0.008         | -0.035         | 0.020          | 0.592  | 0.757      |
| PE(O)         | -0.006                       | -0.029         | 0.016          | 0.571  | 0.901      | 0.002       | -0.012         | 0.016          | 0.754  | 0.964      | 0.006                  | -0.004         | 0.017          | 0.237  | 0.454      | -0.007         | -0.034         | 0.020          | 0.625  | 0.777      |
| Cer(m)        | -0.018                       | -0.040         | 0.004          | 0.102  | 0.901      | -0.009      | -0.023         | 0.005          | 0.199  | 0.491      | 0.005                  | -0.006         | 0.015          | 0.401  | 0.608      | -0.006         | -0.034         | 0.021          | 0.646  | 0.782      |
| FFA           | -0.001                       | -0.024         | 0.021          | 0.899  | 0.919      | 0.000       | -0.014         | 0.014          | 1.000  | 1.000      | -0.002                 | -0.013         | 0.009          | 0.762  | 0.923      | -0.006         | -0.033         | 0.022          | 0.675  | 0.797      |
| dhCer         | -0.009                       | -0.032         | 0.013          | 0.403  | 0.901      | 0.002       | -0.011         | 0.016          | 0.753  | 0.964      | 0.011                  | 0.001          | 0.022          | 0.038  | 0.170      | -0.003         | -0.031         | 0.024          | 0.806  | 0.904      |
| BA            | -0.008                       | -0.031         | 0.014          | 0.461  | 0.901      | 0.002       | -0.012         | 0.015          | 0.820  | 0.973      | -0.004                 | -0.015         | 0.007          | 0.497  | 0.672      | -0.003         | -0.031         | 0.024          | 0.814  | 0.904      |
| PS            | 0.003                        | -0.019         | 0.025          | 0.796  | 0.901      | -0.015      | -0.028         | -0.001         | 0.035  | 0.224      | -0.003                 | -0.014         | 0.008          | 0.614  | 0.785      | -0.003         | -0.031         | 0.024          | 0.826  | 0.904      |
| PA            | -0.003                       | -0.025         | 0.019          | 0.809  | 0.901      | -0.014      | -0.028         | 0.000          | 0.044  | 0.224      | -0.006                 | -0.017         | 0.005          | 0.258  | 0.474      | 0.002          | -0.025         | 0.030          | 0.860  | 0.920      |
| LPI           | -0.003                       | -0.025         | 0.018          | 0.759  | 0.901      | -0.001      | -0.016         | 0.013          | 0.843  | 0.973      | 0.000                  | -0.011         | 0.010          | 0.943  | 0.981      | 0.002          | -0.025         | 0.029          | 0.890  | 0.921      |
| methyl-DE     | 0.016                        | -0.006         | 0.039          | 0.151  | 0.901      | 0.001       | -0.013         | 0.015          | 0.852  | 0.973      | 0.000                  | -0.011         | 0.011          | 0.965  | 0.981      | 0.002          | -0.026         | 0.029          | 0.901  | 0.921      |
| PG            | -0.020                       | -0.042         | 0.002          | 0.080  | 0.901      | -0.016      | -0.029         | -0.002         | 0.021  | 0.221      | -0.001                 | -0.012         | 0.010          | 0.863  | 0.945      | -0.001         | -0.029         | 0.027          | 0.956  | 0.956      |
