# Supplementary material for: Circulating lipid profiles are associated with cross-sectional and longitudinal changes of central biomarkers for Alzheimer’s disease
Source: PubMed Central journal article supplement — medRxiv. 2023 Jun 21:2023.06.12.23291054. Preprint. [Version 2] doi: 10.1101/2023.06.12.23291054 (PMC10312871; doi:10.1101/2023.06.12.23291054), 2023-06-21
Supplement: media-8.pdf [file media-8.pdf]

Supplementary Table 8. Associations of lipid correlation network modules with longitudinal A/T/N biomarkers

| Lipid modules | A: Amyloid PET (AV45) uptake |                |                |        |            | T: CSF pTau |                |                |        |            | N1: Hippocampal volume |                |                |        |            | N2: FDG uptake |                |                |        |            |
|---------------|------------------------------|----------------|----------------|--------|------------|-------------|----------------|----------------|--------|------------|------------------------|----------------|----------------|--------|------------|----------------|----------------|----------------|--------|------------|
|               | Beta                         | 95% CI (Lower) | 95% CI (Upper) | Pvalue | Pvalue(BH) | Beta        | 95% CI (Lower) | 95% CI (Upper) | Pvalue | Pvalue(BH) | Beta                   | 95% CI (Lower) | 95% CI (Upper) | Pvalue | Pvalue(BH) | Beta           | 95% CI (Lower) | 95% CI (Upper) | Pvalue | Pvalue(BH) |
| M23           | -0.010                       | -0.032         | 0.012          | 0.378  | 0.900      | -0.004      | -0.018         | 0.009          | 0.536  | 0.782      | -0.011                 | -0.022         | 0.000          | 0.041  | 0.147      | -0.053         | -0.079         | -0.026         | 0.000  | 0.005      |
| M4            | -0.007                       | -0.029         | 0.015          | 0.557  | 0.900      | -0.015      | -0.029         | -0.001         | 0.030  | 0.270      | -0.011                 | -0.021         | 0.000          | 0.055  | 0.168      | -0.049         | -0.076         | -0.021         | 0.001  | 0.012      |
| M42           | -0.009                       | -0.031         | 0.013          | 0.417  | 0.900      | -0.011      | -0.025         | 0.003          | 0.129  | 0.340      | -0.011                 | -0.022         | 0.000          | 0.041  | 0.147      | -0.045         | -0.071         | -0.018         | 0.001  | 0.014      |
| M44           | -0.017                       | -0.039         | 0.004          | 0.119  | 0.900      | -0.013      | -0.027         | 0.001          | 0.061  | 0.309      | -0.011                 | -0.022         | 0.000          | 0.048  | 0.159      | -0.046         | -0.073         | -0.018         | 0.001  | 0.014      |
| M39           | -0.010                       | -0.032         | 0.012          | 0.387  | 0.900      | -0.021      | -0.034         | -0.007         | 0.004  | 0.164      | -0.019                 | -0.030         | -0.008         | 0.001  | 0.008      | -0.042         | -0.070         | -0.015         | 0.002  | 0.014      |
| M26           | -0.001                       | -0.024         | 0.021          | 0.894  | 0.935      | -0.008      | -0.022         | 0.005          | 0.233  | 0.465      | -0.010                 | -0.020         | 0.001          | 0.074  | 0.213      | -0.044         | -0.071         | -0.016         | 0.002  | 0.014      |
| M25           | -0.006                       | -0.028         | 0.016          | 0.578  | 0.900      | -0.016      | -0.030         | -0.002         | 0.024  | 0.270      | -0.008                 | -0.019         | 0.003          | 0.150  | 0.346      | -0.042         | -0.069         | -0.015         | 0.002  | 0.014      |
| M41           | -0.009                       | -0.031         | 0.013          | 0.428  | 0.900      | -0.010      | -0.023         | 0.004          | 0.171  | 0.414      | -0.002                 | -0.013         | 0.009          | 0.714  | 0.906      | -0.043         | -0.070         | -0.015         | 0.002  | 0.014      |
| M18           | 0.005                        | -0.018         | 0.027          | 0.688  | 0.935      | 0.003       | -0.010         | 0.017          | 0.627  | 0.849      | -0.019                 | -0.030         | -0.009         | 0.000  | 0.008      | -0.037         | -0.064         | -0.009         | 0.009  | 0.040      |
| M38           | -0.001                       | -0.024         | 0.021          | 0.901  | 0.935      | -0.003      | -0.017         | 0.011          | 0.696  | 0.873      | -0.013                 | -0.024         | -0.002         | 0.016  | 0.113      | -0.036         | -0.064         | -0.009         | 0.010  | 0.040      |
| M28           | 0.003                        | -0.019         | 0.025          | 0.792  | 0.935      | -0.008      | -0.022         | 0.006          | 0.276  | 0.497      | 0.002                  | -0.009         | 0.012          | 0.760  | 0.906      | -0.037         | -0.064         | -0.009         | 0.009  | 0.040      |
| M46           | -0.005                       | -0.028         | 0.017          | 0.627  | 0.931      | -0.013      | -0.026         | 0.001          | 0.068  | 0.312      | -0.001                 | -0.012         | 0.010          | 0.863  | 0.906      | -0.035         | -0.063         | -0.008         | 0.011  | 0.041      |
| M11           | -0.010                       | -0.032         | 0.012          | 0.380  | 0.900      | -0.012      | -0.025         | 0.002          | 0.091  | 0.340      | -0.020                 | -0.031         | -0.009         | 0.000  | 0.008      | -0.032         | -0.059         | -0.006         | 0.018  | 0.060      |
| M14           | -0.013                       | -0.035         | 0.009          | 0.243  | 0.900      | -0.002      | -0.016         | 0.012          | 0.804  | 0.902      | -0.016                 | -0.026         | -0.005         | 0.005  | 0.056      | -0.032         | -0.059         | -0.006         | 0.018  | 0.060      |
| M6            | -0.004                       | -0.026         | 0.018          | 0.723  | 0.935      | -0.001      | -0.015         | 0.013          | 0.863  | 0.922      | -0.003                 | -0.014         | 0.008          | 0.581  | 0.835      | -0.033         | -0.061         | -0.005         | 0.020  | 0.063      |
| M19           | 0.008                        | -0.014         | 0.030          | 0.467  | 0.900      | -0.008      | -0.022         | 0.005          | 0.230  | 0.465      | -0.013                 | -0.024         | -0.003         | 0.016  | 0.113      | -0.031         | -0.058         | -0.003         | 0.028  | 0.075      |
| M35           | -0.007                       | -0.029         | 0.015          | 0.531  | 0.900      | -0.002      | -0.016         | 0.012          | 0.761  | 0.898      | -0.001                 | -0.012         | 0.010          | 0.867  | 0.906      | -0.030         | -0.057         | -0.004         | 0.027  | 0.075      |
| M3            | -0.008                       | -0.030         | 0.014          | 0.485  | 0.900      | -0.015      | -0.028         | -0.001         | 0.038  | 0.270      | -0.012                 | -0.023         | -0.001         | 0.031  | 0.144      | -0.030         | -0.057         | -0.003         | 0.030  | 0.077      |
| M31           | -0.010                       | -0.032         | 0.011          | 0.351  | 0.900      | -0.009      | -0.023         | 0.004          | 0.188  | 0.433      | -0.004                 | -0.015         | 0.007          | 0.456  | 0.724      | -0.030         | -0.057         | -0.003         | 0.032  | 0.079      |
| M30           | -0.020                       | -0.042         | 0.003          | 0.083  | 0.900      | -0.011      | -0.025         | 0.003          | 0.119  | 0.340      | -0.002                 | -0.013         | 0.009          | 0.749  | 0.906      | -0.027         | -0.054         | 0.001          | 0.055  | 0.125      |
| M17           | -0.002                       | -0.025         | 0.020          | 0.831  | 0.935      | -0.008      | -0.022         | 0.006          | 0.278  | 0.497      | 0.000                  | -0.010         | 0.011          | 0.936  | 0.936      | -0.027         | -0.054         | 0.001          | 0.057  | 0.125      |
| M21           | -0.015                       | -0.037         | 0.006          | 0.163  | 0.900      | -0.006      | -0.020         | 0.008          | 0.412  | 0.654      | -0.007                 | -0.018         | 0.004          | 0.192  | 0.420      | -0.026         | -0.053         | 0.001          | 0.060  | 0.126      |
| M45           | 0.001                        | -0.021         | 0.024          | 0.896  | 0.935      | -0.011      | -0.026         | 0.003          | 0.120  | 0.340      | 0.002                  | -0.009         | 0.013          | 0.743  | 0.906      | -0.025         | -0.053         | 0.003          | 0.077  | 0.154      |
| M13           | -0.002                       | -0.024         | 0.021          | 0.876  | 0.935      | 0.003       | -0.011         | 0.016          | 0.708  | 0.873      | -0.005                 | -0.016         | 0.006          | 0.359  | 0.636      | -0.023         | -0.050         | 0.004          | 0.089  | 0.171      |
| M9            | 0.001                        | -0.021         | 0.023          | 0.914  | 0.935      | 0.003       | -0.011         | 0.016          | 0.721  | 0.873      | -0.001                 | -0.012         | 0.010          | 0.824  | 0.906      | -0.022         | -0.049         | 0.005          | 0.109  | 0.201      |
| M36           | -0.007                       | -0.029         | 0.014          | 0.509  | 0.900      | -0.011      | -0.025         | 0.003          | 0.116  | 0.340      | -0.009                 | -0.020         | 0.001          | 0.088  | 0.226      | -0.020         | -0.048         | 0.008          | 0.155  | 0.274      |
| M32           | -0.009                       | -0.031         | 0.013          | 0.430  | 0.900      | -0.008      | -0.022         | 0.006          | 0.281  | 0.497      | -0.006                 | -0.017         | 0.005          | 0.291  | 0.558      | -0.020         | -0.047         | 0.008          | 0.163  | 0.278      |
| M15           | -0.008                       | -0.030         | 0.014          | 0.481  | 0.900      | 0.001       | -0.013         | 0.015          | 0.857  | 0.922      | 0.003                  | -0.008         | 0.014          | 0.546  | 0.835      | -0.017         | -0.045         | 0.010          | 0.207  | 0.340      |
| M43           | -0.013                       | -0.035         | 0.009          | 0.258  | 0.900      | 0.005       | -0.008         | 0.019          | 0.448  | 0.688      | -0.004                 | -0.015         | 0.007          | 0.442  | 0.724      | -0.016         | -0.043         | 0.010          | 0.227  | 0.359      |
| M16           | -0.012                       | -0.034         | 0.009          | 0.264  | 0.900      | -0.004      | -0.018         | 0.009          | 0.544  | 0.782      | 0.010                  | -0.001         | 0.020          | 0.079  | 0.214      | 0.017          | -0.011         | 0.044          | 0.240  | 0.368      |
| M40           | -0.003                       | -0.025         | 0.019          | 0.789  | 0.935      | -0.011      | -0.025         | 0.003          | 0.113  | 0.340      | -0.007                 | -0.018         | 0.004          | 0.213  | 0.446      | -0.014         | -0.042         | 0.013          | 0.300  | 0.435      |
| M1            | -0.016                       | -0.038         | 0.006          | 0.143  | 0.900      | -0.014      | -0.028         | 0.000          | 0.045  | 0.270      | -0.003                 | -0.014         | 0.008          | 0.572  | 0.835      | -0.015         | -0.042         | 0.013          | 0.302  | 0.435      |
| M22           | -0.004                       | -0.026         | 0.018          | 0.711  | 0.935      | -0.014      | -0.028         | -0.001         | 0.041  | 0.270      | -0.001                 | -0.012         | 0.010          | 0.842  | 0.906      | -0.014         | -0.042         | 0.014          | 0.330  | 0.461      |
| M34           | -0.014                       | -0.037         | 0.008          | 0.202  | 0.900      | -0.010      | -0.024         | 0.003          | 0.133  | 0.340      | -0.011                 | -0.022         | 0.000          | 0.042  | 0.147      | -0.013         | -0.040         | 0.015          | 0.356  | 0.482      |
| M24           | 0.007                        | -0.016         | 0.029          | 0.563  | 0.900      | -0.011      | -0.025         | 0.003          | 0.125  | 0.340      | 0.005                  | -0.006         | 0.016          | 0.341  | 0.627      | -0.010         | -0.038         | 0.018          | 0.477  | 0.610      |
| M12           | 0.014                        | -0.008         | 0.037          | 0.212  | 0.900      | 0.002       | -0.012         | 0.016          | 0.784  | 0.901      | -0.001                 | -0.012         | 0.010          | 0.899  | 0.919      | -0.010         | -0.038         | 0.017          | 0.467  | 0.610      |
| M10           | -0.012                       | -0.034         | 0.010          | 0.291  | 0.900      | -0.006      | -0.020         | 0.008          | 0.395  | 0.649      | 0.013                  | 0.002          | 0.023          | 0.020  | 0.113      | 0.008          | -0.019         | 0.035          | 0.544  | 0.676      |
| M27           | -0.018                       | -0.040         | 0.004          | 0.102  | 0.900      | -0.009      | -0.023         | 0.005          | 0.199  | 0.436      | 0.005                  | -0.006         | 0.015          | 0.401  | 0.684      | -0.006         | -0.034         | 0.021          | 0.646  | 0.747      |
| M2            | -0.021                       | -0.043         | 0.001          | 0.057  | 0.900      | -0.015      | -0.029         | -0.002         | 0.026  | 0.270      | 0.001                  | -0.010         | 0.012          | 0.843  | 0.906      | -0.007         | -0.035         | 0.021          | 0.617  | 0.747      |
| M5            | -0.002                       | -0.024         | 0.020          | 0.852  | 0.935      | 0.001       | -0.013         | 0.015          | 0.894  | 0.922      | -0.002                 | -0.013         | 0.009          | 0.711  | 0.906      | -0.006         | -0.034         | 0.021          | 0.649  | 0.747      |
| M7            | 0.012                        | -0.010         | 0.034          | 0.296  | 0.900      | 0.001       | -0.013         | 0.015          | 0.902  | 0.922      | -0.008                 | -0.019         | 0.003          | 0.133  | 0.323      | -0.005         | -0.032         | 0.023          | 0.748  | 0.839      |
| M33           | 0.001                        | -0.021         | 0.024          | 0.909  | 0.935      | -0.014      | -0.028         | 0.000          | 0.047  | 0.270      | 0.007                  | -0.004         | 0.018          | 0.229  | 0.458      | 0.003          | -0.024         | 0.031          | 0.808  | 0.871      |
| M29           | -0.017                       | -0.039         | 0.005          | 0.125  | 0.900      | -0.007      | -0.020         | 0.007          | 0.341  | 0.582      | 0.002                  | -0.009         | 0.012          | 0.755  | 0.906      | -0.003         | -0.031         | 0.025          | 0.831  | 0.871      |
| M20           | -0.001                       | -0.023         | 0.021          | 0.946  | 0.946      | -0.001      | -0.015         | 0.013          | 0.937  | 0.937      | -0.001                 | -0.012         | 0.010          | 0.864  | 0.906      | 0.003          | -0.024         | 0.030          | 0.833  | 0.871      |
| M37           | -0.003                       | -0.025         | 0.019          | 0.794  | 0.935      | 0.004       | -0.010         | 0.017          | 0.610  | 0.849      | 0.013                  | 0.002          | 0.024          | 0.018  | 0.113      | -0.001         | -0.028         | 0.026          | 0.929  | 0.949      |
| M8            | -0.006                       | -0.028         | 0.016          | 0.587  | 0.900      | 0.003       | -0.011         | 0.017          | 0.651  | 0.856      | 0.012                  | 0.002          | 0.023          | 0.024  | 0.121      | 0.000          | -0.028         | 0.027          | 0.984  | 0.984      |
